1 **Characterization of the cryptic interspecific hybrid *Lemna* × *mediterranea* by an integrated**  
2 **approach provides new insights into duckweed diversity**

3 Luca Braglia<sup>1§\*</sup>, Simona Ceschin<sup>2,3§</sup>, M. Adelaide Iannelli<sup>4§</sup>, Manuela Bog<sup>5</sup>, Marco Fabriani<sup>4</sup>, Giovanna  
4 Frugis<sup>4</sup>, Floriana Gavazzi<sup>1</sup>, Silvia Gianì<sup>1</sup>, Flaminia Mariani<sup>2</sup>, Maurizio Muzzi<sup>2</sup>, Emanuele Pelella<sup>2</sup>, Laura  
5 Morello<sup>1</sup>

6 <sup>1</sup>*Institute of Agricultural Biology and Biotechnology, National Research Council, Via Bassini 15, 20133*  
7 *Milan, Italy*

8 <sup>2</sup>*Department of Sciences, University of Roma Tre, Viale G. Marconi 446, 00146 Rome, Italy*

9 <sup>3</sup>*NBFC -National Biodiversity Future Center, 90133 Palermo, Italy.*

10 <sup>4</sup>*Institute of Agricultural Biology and Biotechnology, National Research Council, Via Salaria Km.*  
11 *29,300, 00015 Monterotondo, Rome, Italy*

12 <sup>5</sup>*Institute of Botany and Landscape Ecology, University Greifswald, Soldmannstr. 15, 17489*  
13 *Greifswald, Germany*

14 <sup>§</sup> *Equally contributing Authors*

15 <sup>\*</sup> *Corresponding Author*

16

17

18 **ABSTRACT**

19 Lemnaceae taxonomy is challenged by the particular morphology of these tiny free-floating angiosperms,  
20 reduced to a single leaf-like structure called frond, without or with one to few roots. Although molecular  
21 taxonomy has helped clarify the phylogenetic history of this family, inconsistency between morphological  
22 data and nuclear and plastid markers still poses challenging questions in some cases, leading to frequent  
23 misclassifications in the genus *Lemna*. Recently, the finding that *Lemna japonica* is an interspecific hybrid  
24 between *Lemna minor* and *Lemna turionifera*, provided a clear explanation to one of such taxonomic  
25 questions. Here we demonstrated that *L. minor* is also capable to hybridize with *Lemna gibba*, generating  
26 a cryptic, previously unrecognized, but widespread taxon in the Mediterranean area. The nothotaxon  
27 *Lemna* × *mediterranea* is described through the detailed investigation of seven hybrid clones from a living  
28 germplasm collection and compared with clones of the putative parental species *L. minor* and *L. gibba*.  
29 Genetic analysis revealed that two different cytotypes, diploid and triploid, originated by at least two  
30 independent hybridization events. Despite high overall similarity, morphometrical, physiological and  
31 biochemical analyses showed an intermediate position of *L. × mediterranea* between its parental species  
32 in most qualitative and quantitative characters, and also separation of the two hybrid cytotypes by some  
33 criteria. These data provide evidence that hybridization and polyploidization, driving forces of terrestrial  
34 plant evolution, contribute to the duckweed genetic diversity and may have also shaped the phylogenetic  
35 history of these mainly asexual, aquatic plants. Further elucidation of hybridization mechanisms and  
36 flowering regulation will provide perspectives for future breeding strategies.

37

38 **Keywords**

39 Duckweed, aquatic plants, interspecific hybrids, cytotype, *Lemna gibba*, *Lemna minor*, DNA barcoding,  
40 morphometry

41

## 42 INTRODUCTION

43

44 The Lemnaceae family is exclusively composed of aquatic plants (commonly named duckweeds) that are  
45 the smallest flowering plants, showing a body plan reduced to a single leaf-like structure called frond,  
46 without or with one or few roots. Main morphological traits are limited to frond shape, size and colour,  
47 root number and length, and position and number of vegetative pouches (Landolt, 1986). Additional  
48 diagnostic traits are vein number, the presence of a prophyllum at the base of the root(s) or papules on the  
49 dorsal side of the frond. Flowers, fruits and seeds, provide important additional taxonomic traits but are  
50 rarely or never observed in some species, as duckweeds mostly propagate asexually by forming daughter  
51 fronds from vegetative pouches on the mother frond. Key morphologic features for each species were  
52 recently updated (Bog et al., 2020a), but classification by morphology remains in some cases insufficient  
53 as not all specimens are assignable to one of the 36 recognized species with confidence. A detailed  
54 morphometric analysis has proven helpful to distinguish the American species *Lemna minuta* Kunt,  
55 invasive in Europe, from the native *Lemna minor* L. (Ceschin et al., 2016). The problem has been partially  
56 overcome with the introduction of molecular taxonomy that provided new instruments for species  
57 delimitation. Barcoding plastid markers (Les et al., 2002; Wang et al., 2010; Borisjuk et al., 2015) and  
58 nuclear sequences, as ITS, ETS (Tippery et al., 2015) as well as AFLP (Bog et al., 2015; Bog et al., 2019),  
59 mostly contributed to an almost complete phylogenetic reconstruction of the Lemnaceae family, which  
60 includes five monophyletic genera: *Lemna*, *Spirodela*, *Landoltia*, *Wolffia* and *Wolffiella* (Les and  
61 Crawford, 1999). Nevertheless, some species remain poorly delimited, particularly in the genera *Wolffia*  
62 and *Wolffiella* (Tippery et al., 2015; Bog et al., 2019). In the genus *Lemna*, inconsistency between nuclear  
63 and plastid markers impairs taking apart clones of *Lemna japonica* Landolt (Landolt, 1980), often  
64 mistaken for *Lemna minor*: plastid barcoding sequences are in fact almost identical. This issue was  
65 recently solved by using the nuclear molecular marker TBP, based on intron-length polymorphism of the  
66  $\beta$ -tubulin gene family members, which provided evidence that this species is an interspecific hybrid  
67 between *L. minor* and *Lemna turionifera* (Braglia et al., 2021a). This was recently confirmed by whole  
68 genome sequencing of three different *Lemna*  $\times$  *japonica* clones flanked by Genomic In Situ Hybridization  
69 analysis (Ernst et al., 2023). The three taxa form a species complex (an assemblage of species, which are  
70 related morphologically and phylogenetically, so that the boundaries between them are often unclear),  
71 which includes cytotypes with different ploidy levels, under detailed investigation by a multidisciplinary  
72 approach including pangenome analysis, genome size measurement, karyotype analysis in combination  
73 with physiological aspects (Abramson et al., manuscript in preparation).

74 *Lemna minor* also shares many morphological traits with the sister species *Lemna gibba* L. and distinction  
75 of the two may be challenging in some cases. Usually, *L. gibba* specimens are easily identified for the

76 pronounced gibbosity of the ventral side of its fronds, due to a diffused and inflated aerenchyma, but this  
77 trait is partially influenced by growth conditions that in some cases do not make it as noticeable (Landolt,  
78 1986). In addition, intermediate forms that cannot be determined with certainty have been reported in The  
79 Netherlands (De Lange and Pieterse, 1973; Kandeler, 1975; Landolt, De Lange and Westinga, 1979) so  
80 that the two species have been described as forming a species complex (De Lange et al., 1981).  
81 Interestingly, a new species similar to *L. gibba* was described in Italy in 1973 under the name *L. symmeter*  
82 Giuga (Giuga, 1973). However, the description of this species was not validly published following the  
83 criteria of the time (no Latin description), and almost forgotten. *Lemna symmeter* had been identified at  
84 several sites along the coast of the Campania region (Southern Italy) and described as similar to the  
85 strongly globose *L. gibba*, but only slightly ventricose and with smaller aerenchyma spaces. In particular,  
86 the two species were described as easily distinguished for the symmetric growth of the two stamens in *L.*  
87 *symmeter*, compared with the asynchronous growth in *L. gibba*. While *L. gibba* was reported to produce  
88 fruits and seeds, *L. symmeter* was described as sterile, producing abortive ovules and indehiscent anthers  
89 (Giuga, 1973). Kandeler (1975) hypothesized that *L. symmeter* could be an interspecific hybrid between  
90 *L. gibba* and *L. minor*, as also later reported by Landolt (1986), but this possibility was never investigated  
91 thereafter.

92 More recently, non-gibbous forms of *L. gibba*-like specimens of uncertain taxonomic assignment were  
93 described at some places in Central Italy (Marconi et al., 2019). However, when analysed by plastid  
94 markers, these specimens were all assigned to *L. minor*, supporting the idea of morphologic variants of  
95 this species. One of the clones isolated during that study was sent to the Landolt collection and registered  
96 as 9562; it is analysed here and designated as the hybrid type.

97 The existence of natural interspecific hybrids between *L. minor* and *L. gibba* was finally hypothesized,  
98 upon a large screening of clones belonging to the *Lemna* genus present in the Landolt Duckweed  
99 Collection (Braglia et al., 2021b). Similar to *L. × japonica*, the new hybrid taxon was first identified on a  
100 molecular basis by TBP fingerprinting and reported with the hybrid formula *L. gibba* × *L. minor*. This  
101 finding accounts for the erroneous species assignment using plastid markers of maternal origin.

102 The main aims of this paper are: (i) to fully demonstrate on a genetic basis the hybrid nature of the six  
103 clones previously identified, plus an additional one (LM0027) successively recovered from the Botanical  
104 Garden of Naples (Italy), and (ii) to characterize this interspecific *Lemna* hybrid based on morphological,  
105 physiological and biochemical traits in comparison with clones of the two parental species. Such  
106 characterization is supported by molecular analysis of plastid and nuclear markers of the six original  
107 clones of the Landolt Collection plus an additional one coming from the Botanical Garden of Naples  
108 (Italy).

109

110 **MATERIALS & METHODS**

111

112 **Plant material**

113 Seven putative hybrid clones, here assigned to the hybrid taxon *L. × mediterranea*, were analysed in  
114 comparison with several clones of the two parental species, *L. minor* and *L. gibba* by different approaches.  
115 Most analysed clones originated from the historical living plant collection of Prof. Elias Landolt (Lammler  
116 and Bogner, 2004), presently maintained as part of the IBBA collection (Milano, Italy), while others came  
117 from other collections in Europe or were collected in Italy by the Authors and integrated into the IBBA  
118 collection. All clones are listed in Table 1 with the name of the donor, collection site and date, and the  
119 experiment in which they have been used.

120

121 **Table 1.** List of analysed accessions.

| clone ID | Taxon                    | Country   | State/City/Region          | Collection site            | Donor | Year | morphology | cp markers | AFLP | qPCR | RGS |
|----------|--------------------------|-----------|----------------------------|----------------------------|-------|------|------------|------------|------|------|-----|
| 6861     | <i>L. x mediterranea</i> | Italy     | Tuscany                    | Massaciuccoli Lake         | WL    | 1954 | X          | X          | X    | X    | X   |
| 7320     | <i>L. x mediterranea</i> | Egypt     | Cairo                      | Garden Dokki               | WL    | 1970 | X          | X          | X    | X    | X   |
| 7641     | <i>L. x mediterranea</i> | Israel    | Haifa                      | Hadera, Kirket Batih       | WL    | 1972 | X          | X          | X    | X    | X   |
| 9562     | <i>L. x mediterranea</i> | Italy     | Umbria, Perugia            | Trasimeno Lake, Passignano | KJA   | 2011 | X          | X          | X    | X    | X   |
| 9248     | <i>L. x mediterranea</i> | Italy     | Trentino                   | Trento, Loc. Alvi          | WL    | 1999 | X          | X          | X    | X    | X   |
| 9425a    | <i>L. x mediterranea</i> | Germany   | Hamburg                    | near Elbe                  | WL    | 2006 | X          | X          | X    | X    | X   |
| LM0027   | <i>L. x mediterranea</i> | Italy     | Campania, Naples           | Botanical Garden           | CF    | nd   | X          | X          | X    | X    | X   |
| 9598     | <i>L. gibba</i>          | Italy     | Sicily                     | nd                         | WL    | 2011 | X          |            | X    | X    |     |
| 7742a    | <i>L. gibba</i>          | Italy     | Sicily, Catania            | Botanical Garden           | KJA   | 1973 | X          |            | X    | X    |     |
| 0190     | <i>L. gibba</i>          | USA       | North Carolina             | nd                         | WL    | 2021 |            |            | X    |      |     |
| 7705     | <i>L. gibba</i>          | India     | Gujarat                    | nd                         | WL    | 1972 |            |            | X    |      |     |
| 7796     | <i>L. gibba</i>          | Italy     | Sicily                     | Catania province           | KJA   | nd   |            |            | X    |      | X   |
| 7922     | <i>L. gibba</i>          | Argentina | Buenos Aires               | nd                         | WL    | 1973 |            |            | X    |      | X   |
| 9482     | <i>L. minor</i>          | Italy     | Apulia, Bari               | nd                         | WL    | 2006 | X          |            | X    | X    |     |
| 5500     | <i>L. minor</i>          | Ireland   | County Cork, Blarney       | 5 miles East of Blarney    | KJA   | nd   | X          |            | X    | X    | X   |
| 9424     | <i>L. minor</i>          | Germany   | Lower Saxony               | Niedersachsen              | WL    | 2006 |            |            | X    |      |     |
| 7194     | <i>L. minor</i>          | Uganda    | Masaka                     | nd                         | KJA   | 1968 |            |            | X    |      | X   |
| 7753     | <i>L. minor</i>          | Ethiopia  | Hara, Semien, Djinbar-Wans | nd                         | KJA   | 1973 |            |            | X    |      | X   |
| 8292     | <i>L. minor</i>          | Iran      | Mazandaran, Ramsar         | Ghassem Abbath             | KJA   | 1974 |            |            | X    |      |     |
| 9495     | <i>L. minor</i>          | Norway    | Stavanger                  | nd                         | KJA   | 2009 |            |            | X    |      | X   |

WL, Walter Lammler; KJA, Klaus J. Appenroth; CF, Cinzia Forni

## 123 **Propagation of duckweed clones**

124 Axenic stock cultures were maintained in Petri dishes on agarized SH medium, pH 5.1 (Schenk and  
125 Hildebrandt, plus 8 g/L Plant Agar, Duchefa) supplemented with 0.1 % sucrose, under the following  
126 growth conditions: T = 18°C; photoperiod: 16 h day, 8 h night; light intensity:  $80 \pm 10 \mu\text{mol m}^{-2} \text{s}^{-1}$ . For  
127 each set of analysis/measurements, plants were transferred into liquid medium or water, as described in  
128 the specific experimental section.

## 130 **DNA Extraction and quantification**

131 DNA extraction was performed from about 100 mg fresh weight, using the DNeasy Plant Mini Kit  
132 (QIAGEN) as reported previously (Braglia et al., 2021a) and eluted in 150  $\mu\text{L}$  of 50 mM TRIS, pH 9.  
133 When necessary, DNA was more precisely quantified through the dsDNA HS Assay Kit for Qubit  
134 fluorometer (Thermo Fisher Scientific).

## 136 **Relative Genome size measurement**

137 Relative genome size measurements were performed using a CyFlow Space flow cytometer (Sysmex  
138 Partec GmbH, Görlitz, Germany). To extract nuclei from fresh plant tissue, about 3-4 fronds of the internal  
139 standard *Lemna aequinotialis* Welw. (6746) and 2-3 fronds of the sample were chopped carefully in 500  
140  $\mu\text{L}$  Otto I buffer (0.1 M citric acid, 0.5% (v/v) Tween 20; Ulrich and Ulrich, 1991) with a sharp razor  
141 blade. The extract was incubated for 5 min on ice and then filtered (ca. 30  $\mu\text{m}$  filter size). Subsequently,  
142 500  $\mu\text{L}$  of the staining Otto II buffer (0.4 M  $\text{Na}_2\text{HPO}_4$ , 4 mg/ml DAPI; Ulrich and Ulrich, 1991) were  
143 added and the sample was measured after an incubation of 5 min in darkness in the flow cytometer  
144 equipped with a 375-nm UV laser. Data collection was stopped after minimum 10,000 events and the  
145 relative genome sizes were calculated as the proportion of fluorescent intensities of the sample to the  
146 internal standard.

## 148 **TBP amplification**

149 TBP amplification, amplicon separation by capillary electrophoresis (CE) and fragment analysis were  
150 performed as reported in Braglia et al. (2023) with minor variations. Amplification of specific  $\beta$ -tubulin  
151 loci (*TUBB1* and *TUBB2*) was performed according to Braglia et al. (2021a).

## 153 **DNA barcoding analysis**

154 The *atpF-atpH* and *psbK-psbI* plastid intergenic spacers were investigated as DNA barcoding regions by  
155 PCR amplification followed by Sanger sequencing as reported in Braglia et al. (2021b). Species identity  
156 was inferred from BLAST analysis against the corresponding sequences of *L. minor* (5500) and *L. gibba*

157 (7742a) reference clones. For SNPs identification, sequences were aligned using the Vector NTI  
158 alignment tool, AlignX.

159

## 160 **AFLP and data analysis**

161 The AFLP analysis was performed on all 21 duckweed clones listed in Table 1 and referring to three plant  
162 groups: *L. gibba*, *L. minor* and putative hybrids *L. × mediterranea*. Fifty nanograms of gDNA were  
163 analysed following the protocol of Vos et al., (1995) with modifications as described in Braglia et al.,  
164 (2021b) considering a double DNA digestion (*EcoRI* and *MseI*) and performing pre-selective and selective  
165 PCR amplification steps using the primers listed in Table S1. The Capillary Electrophoresis (CE) loading  
166 mixture and running protocol were prepared and adopted accordingly to Braglia et al., (2023). The AFLP  
167 pherogram elaboration and processing was performed by Gene Mapper Software v. 5.0 (Thermo Fisher  
168 Scientific, Germany), allowing the amplicon sizing and alleles detection. For scoring all the nine primer  
169 combinations (PCs), the RFUs peak detection threshold was fixed above 250 and a size range was  
170 considered between 70 and 450 base pairs. The peak size (base pairs) and height (RFUs) of each  
171 electropherogram were collected through a Microsoft Office Excel file and all the AFLP profiles were  
172 aligned according to the peak size. A binary matrix was then generated for each PC by the scoring for the  
173 presence/absence of homologous bands (0/1 respectively). FAMD - Fingerprint Analysis with Missing  
174 Data program, v.1.31 (Schlüter & Harris, 2006) was used to estimate genetic parameters: percentage of  
175 polymorphic markers, number of fixed markers, number of private markers found in each group, within-  
176 groups mean gene diversity (HS) and Nei's (1973) between-groups gene diversity ( $G_{ST}$ ). Pearson's  
177 correlation was calculated by Past 4 software v. 4.13 for Windows (Hammer et al., 2001) in order to  
178 estimate the linear association between the analysed clones. A principal component analysis (PCA) was  
179 also performed using the same software. A neighbour-net diagram was constructed using SplitsTree v.  
180 4.19.0 (Huson and Bryant, 2006) applying the Nei-Li coefficients (Nei and Li, 1979). Two-thousand  
181 replicates were considered when performing the bootstrap analysis. The presence/absence matrix was also  
182 analysed by a more general Bayesian clustering approach using Structure v. 2.3.4 (Pritchard et al., 2000)  
183 and a more specific one for hybrid detection using NewHybrids v. 1.1 (Anderson and Thompson, 2002).  
184 As a first step, the initial matrix, which consisted of 1671 loci, was reduced to 694 loci by applying a  
185 minimum allele frequency of 25%, since the high proportion of loci with a low allele frequency hampered  
186 the Structure analysis to converge. The final dataset was run as diploid data with recessive alleles for the  
187 number of K clusters ranging from 1 to 5, with 50,000 burn-in steps and 50,000 additional steps. In total  
188 10 repetitions for each K were run. The results from Structure were analysed by the Delta K method  
189 (Evanno et al., 2005) as implemented in StructureHarvester (Earl and von Holdt, 2012). Clumpp v1.1.2  
190 (Jakobsson and Rosenberg, 2007) was used to average the 10 repetitions for each K for visualisation. For



191 the NewHybrids analysis, five datasets were created, each with 200 randomly selected loci from the  
192 Structure dataset, as NewHybrids only runs stable for a limited number of loci. After a burn-in of 10,000  
193 steps, additionally 20,000 steps were collected. Finally, the results of the five runs were averaged.

194

### 195 **Homoeolog-specific qPCR**

196 The following procedure is an adaptation of the technique described as double-mismatch allele-specific  
197 (DMAS) qPCR for SNP genotyping (Lefevre, 2019). Instead of discriminating homo/heterozygous loci  
198 differing for one SNP, the technique is here applied to assign triploid hybrid clones to any of the two  
199 possible subgenome compositions, either two chromosome sets from *L. gibba* and one from *L. minor*  
200 (GGM) or vice versa (MMG). The assay, selectively targeting a short fragment of the *TUBB2* locus in  
201 either *L. gibba* or *L. minor* genome, includes two slightly different primer pairs, one for each species-  
202 specific target, with similar annealing temperatures (60°C). Primer sequences are reported in Table S1. In  
203 the genome of hybrids, the two primer pairs are therefore homoeolog-specific, although amplification on  
204 the non-target homoeolog occurs at higher C<sub>q</sub>. The principle is that, in parallel PCR amplifications,  
205 absolute  $\Delta C_q$  between the two primer pairs (C<sub>q<sub>minor</sub></sub>-C<sub>q<sub>gibba</sub></sub>) is maximal for both target species *L. minor*  
206 and *L. gibba*, homozygous at this locus, and close to zero for homoploid hybrids, where both subgenomes  
207 are equally present, behaving as heterozygous. Intermediate subgenome compositions in triploid hybrids  
208 should produce higher or lower  $\Delta C_q$ (<sub>minor-gibba</sub>) values with respect to the diploid hybrids, respectively,  
209 depending on the prevalent subgenome.

210 PCR amplification was performed in a CFX-connect qPCR system (BIORAD) with hard-shell-96 well  
211 plates (BIORAD). Each reaction was carried out with 4  $\mu$ L master mix (Titan HotTaq EvaGreen,  
212 BIOATLAS), 0.5  $\mu$ L of each primer (from a 100  $\mu$ M stock) and 3  $\mu$ L of DNA (2 mg/mL), in a final  
213 volume of 50  $\mu$ L. The two-step amplification profile used was the following: initial denaturation, 15 min  
214 at 95°C, followed by 39 cycles of 15 sec 95°C/60 sec 60°C and final denaturation by 0.5°C step-increase  
215 up to 95°C for melting curve analysis. Primers are listed in Table S1.

216 The threshold for C<sub>q</sub> determination was set by the regression method. Primer specificity and amplification  
217 efficiency were first tested on serial dilutions (2, 0.2, 0.02 mg/mL) of gDNA purified from each parental  
218 species, *L. gibba* clones 7742a and 9598) and *L. minor* (clone 5500 and 9482), accurately quantified  
219 fluorometrically in duplicate, diluted to 2 mg/mL and measured again. Artificial hybrid genomes were  
220 then obtained by independently mixing gDNA from *L. minor* 5500 (M) with *L. gibba* (G) 7742a and *L.*  
221 *minor* 9482 (M) with *L. gibba* (G) 9598. Equimolar (1:1) DNA ratios (MG mix 1-2) mimicked homoploid  
222 hybrid genomes, while two unbalanced mixtures in 1:2 molar ratios (GGM mix 1-2 and MMG mix 1-2)  
223 simulated triploid hybrid genomes. The method was first validated by parallel PCR amplifications with  
224 the two primer pairs on the six artificial hybrid genomes. For statistical significance,  $\Delta C_q$  of each group

225 (MG, MMG and GGM) were averaged and analysed by one-tailed ANOVA. The DNA of the two target  
226 species and the seven hybrid clones was then tested in triplicate in at least two independent experiments,  
227 by the same parallel PCR amplification. For each sample,  $\Delta Cq$  of all 9 replicates, excluding outliers ( $\pm 2Cq$   
228 from the mean) were mediated and plotted. The difference of the  $Cq$  means between triploid and diploid  
229 *Lemna* clones was tested by Student's T testing and ANOVA.

230

### 231 **Morphological analyses**

232 Morphological analyses were carried out on fronds of each of the seven putative hybrid *Lemna* clones  
233 assigned to the hybrid taxon *Lemna*  $\times$  *mediterranea*, that were grown in the laboratory for three weeks,  
234 under uncontrolled temperature and light conditions, in 600 ml glass beakers filled with mineral water of  
235 known composition (Table S2). For comparison, two diploid clones of each parental species *L. gibba*  
236 (clone 7742a and 9598) and *L. minor* (clone 5500 and 9482), of European origin, were similarly grown  
237 and analysed. The entire set of beakers was placed near the window to be exposed directly to natural light  
238 respecting the summer seasonal photoperiod.

239 To morphologically describe the putative hybrid clones, 10 specimens of each clone were randomly  
240 collected in parallel with those of the parental species, for a total of 110 fronds. Each of these specimens  
241 were observed and photographed in dorsal, ventral and lateral position under a stereomicroscope  
242 (Olympus SZX2-ILLT) equipped with an Olympus OM-D EM-5 camera. Morphological traits of each  
243 specimen were analysed and measured using the image-processing program ImageJ software v. 1.53t  
244 (Schneider et al., 2012). The analysed traits were selected after consulting reference literature related to  
245 *Lemna* species (e.g., Landolt, 1980, 1986; Ceschin et al., 2016; Bog et al., 2020b). They included both  
246 quantitative and qualitative morphological characters, as listed below (Fig. 1). If the specimen consisted  
247 of contiguous fronds (colony), the traits were analysed only on the mother frond; it was complete with  
248 root, and was the largest and placed above all the other fronds.

249

#### 250 *Quantitative traits*

- 251 - frond length and width (mm)
- 252 - frond length/width ratio
- 253 - frond area (mm<sup>2</sup>)
- 254 - vein number (n)
- 255 - root length (mm)
- 256 - distance frond base-root base (mm)
- 257 - aerenchyma percentage coverage in frond (%)
- 258 - aerenchymatic cell length (mm)

259

260 *Qualitative traits*

261 - frond shape (obovate/pear-shaped/bilobate irregular/rhomboid/stocky rhomboid)

262 - frond symmetry (symmetrical/asymmetrical)

263 - frond apex (rounded/acuminate)

264 - hyaline layer on the frond edge (no hyaline layer/basal hyaline/central-basal hyaline/all around hyaline)

265 - aerenchyma position related to frond area (dispersed/central/upper-central)

266 - aerenchyma reaching or not the frond edge

267 - papules (absent/unclear/evident)

268 - connection stipe (presence/absence)

269

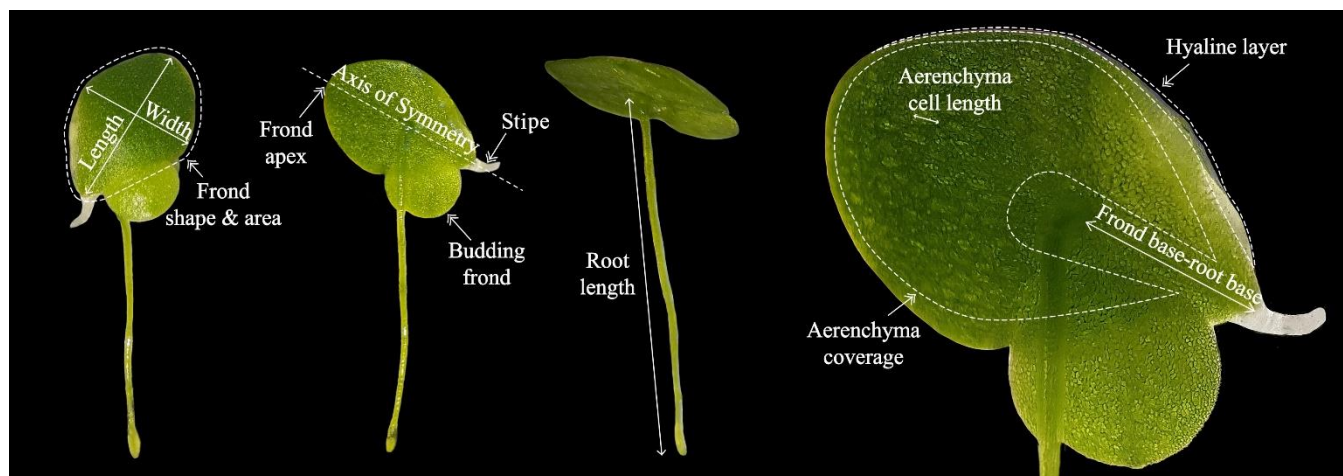

270

271 **Figure 1.** Illustration of the morphological traits analysed.

272

273 **Scanning electron microscope (SEM) observations**

274 From each of the four *Lemna* groups identified by genome size measurement, 10 specimens were  
275 randomly taken and fixed overnight at 4°C in a mixture of 2% paraformaldehyde and 3% glutaraldehyde  
276 in 0.1 M cacodylate buffer. The next day, specimens were thoroughly washed in the same buffer and post  
277 fixed in 1% buffered osmium tetroxide for 90 minutes at 4°C. After thorough washing, first in 0.1 M  
278 cacodylate buffer and then in double-distilled water, the specimens were dehydrated through a graded  
279 ethanol series (15, 30, 50, 75, 85, 95 and 100%) and dried in a Critical Point Dryer (CPD 030 unit, BalTec,  
280 Balzers, Liechtenstein). Specimens were mounted on aluminium stubs using double-sided carbon discs  
281 and gold sputtered using a K550 sputter coater (Emithech, Kent, UK). The specimens were then observed  
282 and microphotographed by scanning electron microscope (SEM) (Gemini 300, Carl Zeiss AG, Jena,  
283 Germany).

284

## 285 **Analysis of plant growth and biochemical parameters**

286 Plant growth and biochemical analyses were performed on cultures grown under controlled and axenic  
287 conditions in 150 x 75 mm (d x h) Petri dishes (Corning Inc., Corning, NY, USA) that contained 150 mL  
288 of freshly prepared, liquid SH medium (pH adjusted to 5.5) and 0.5% sucrose. Plants were cultivated at a  
289 16 h day photoperiod under  $100 \mu\text{mol photons m}^{-2} \text{s}^{-1}$  at  $25 \text{ }^\circ\text{C} \pm 2 \text{ }^\circ\text{C}$ . Experimental cultures were started  
290 by inoculating 30 colonies with 2-3 fronds each. Growth measurements and biochemical analyses were  
291 carried out after seven days. All cultures were set up in quintuplets.

292

## 293 **Frond vascular organization**

294 To determine frond vein numbers, ten duckweed colonies, with two/three fronds each, were washed with  
295 deionized water and cleared with 70% ethanol for three weeks prior to observations using a Nikon  
296 stereomicroscope (Nikon SMZ1000) equipped with a Nikon digital camera (DS-5M;  
297 [www.nikoninstruments.com/](http://www.nikoninstruments.com/)). Duckweed colonies were observed under bright and dark field conditions  
298 at 20x and 10x magnification.

299

## 300 **Stomatal traits**

301 To characterize stomatal traits, for each *Lemna* clone, three colonies with 2 or 3 fronds were washed in  
302 demineralised water and immersed in 70% ethanol solution for three weeks to remove any pigmentation.  
303 Stomata features were examined and photographed using a Nikon microscope (ECLIPSE 80i) equipped  
304 with a digital camera (Nikon DS-5M; [www.nikoninstruments.com/](http://www.nikoninstruments.com/)). Stomatal density and stomata size  
305 were determined by analysing images of four different microscopic fields ( $0.95 \mu\text{m}^2$ ) for each mother  
306 frond of three colonies/clone at a magnification of 20x. Fields were selected in the regions located between  
307 the main vein and the closest secondary vein (two sectors to each side of the main vein) (Fig. S1). Stomatal  
308 density (SD) was expressed as stomata number/area of one microscopic field (area). The size of stomata  
309 was measured using the LeafNet software (Li et al., 2022). Parameters were adjusted by setting “Stained  
310 Denoiser” for the Image denoiser function and “StomaNet Universal” for the Stoma detector function.  
311 Stoma minimum size was set to  $300 \mu\text{m}^2$ .

312

## 313 **Analyses of growth parameters**

314 For fresh and dry weight measurements, all plants from each tested clone were sieved out of the medium,  
315 dry blotted and either weighed immediately (fresh weight) or dehydrated at  $60 \text{ }^\circ\text{C}$  for 72 hours and then  
316 weighed (dry weight).

317 The mean single frond fresh weight of each clone was estimated by measuring the total biomass of each  
318 experimental culture and dividing by the corresponding total number of fronds (including daughter fronds

319 when still attached to the mother) previously counted using the ImageJ image processing program  
320 (Schneider et al., 2012).

321

### 322 **Relative Growth Rate**

323 The relative growth rate (RGR) of each *Lemna* clones was measured after seven days and calculated using  
324 the following formula:  $RGR = \ln(DW_f - DW_i) / T_f - T_i$

325 where:  $DW_f$  = final dry weight (g),  $DW_i$  = initial dry weight (g),  $T_f$  = total incubation period (day),  $T_i$  =  
326 initial time (day). The results were expressed as  $g\ g^{-1}\ day^{-1}$ .

327

### 328 **Determination of chlorophyll and carotenoid contents**

329 Fresh fronds (0.1 g) were grounded into powder with liquid nitrogen, and then homogenized with 80%  
330 (w/v) cold acetone, centrifuged at 5000xg for 10 min. The absorbance of the supernatant was measured at  
331 663, 646 and 470 nm. Chlorophyll a, b and carotenoids content were determined using the equations  
332 described in Lichtenthaler (1987). The results were expressed in mg of chlorophyll or carotenoids per  
333 gram of plant tissue fresh weight (mg/g FW).

334

### 335 **Measurement of protein content**

336 *Lemna* fronds (0.1 g fresh weight) were grinded in liquid nitrogen with mortar and pestle. The proteins  
337 were then extracted at 4 °C with a cold 0.5 M potassium phosphate (pH 7.0) buffer containing 0.1%  
338 ascorbic acid, 0.1% Triton X-100, 1 mM EDTA and 7.5% polyvinylpyrrolidone. The homogenate was  
339 centrifuged at 4 °C for 20 min at 12000xg. The total soluble proteins were quantified according to  
340 Bradford (1976) using albumin bovine serum as standard. The results were expressed in mg of proteins  
341 per gram of fresh weight plant tissue (mg/g FW).

342

### 343 **Statistical analyses (for morphological data)**

344 All statistical analyses were performed using R software, vers. 4.2.1. (R Core Team, 2022). All selected  
345 morphological traits and datasets comprising growth analysis and biochemical parameters were analysed  
346 using Principal Component Analysis (PCA), and biplots were made considering PC1 and PC2 using either  
347 ggfortify or the factoextra packages of the R software (Tang et al., 2016; Kassambara and Mundt, 2020).  
348 For plant growth and biochemical data analyses, the cos2 values were considered. A high cos2 value  
349 indicates a higher impact of the Wtraits were compared between clones using ANOVA. Where  
350 assumptions of normality and homoscedasticity were not met, a non-parametric test was conducted  
351 (Kruskal-Wallis). Qualitative traits were analysed by calculating contingency tables and performing  
352 Pearson's Chi-squared tests. Boxplots and mosaicplots were made using ggplot2 package v. 3.4.2

353 (Kassambara, 2023). Specifically, for multivariate analyses “ade4” and “vegan R packages were used  
354 (Dray & Dufour, 2007; Oksanen et al., 2020) and the significance level was set to  $P < 0.05$ . The post hoc  
355 Tukey’s Honest Significant Difference test (TukeyHSD) was run to adjust P-values for multiple  
356 comparisons to determine which samples have significantly different means in paired sample comparison.  
357

## 358 **RESULTS**

### 360 **Molecular characterization of the additional, putative hybrid, *Lemna* clone LM0027**

361 The hybrid origin of six of the seven clones analysed in this study from an interspecific cross between *L.*  
362 *minor* and *L. gibba* was previously suggested, relying on TBP profiling and plastid marker sequences  
363 (Braglia et al., 2021b). The six specimens were all identified as *L. gibba* by their collector E. Landolt, by  
364 morphologic analysis. An additional clone included in this study, LM0027 was instead classified as *L.*  
365 *minor* by its collector (C. Forni, personal communication to M.A.I.). However, the same TBP pattern as  
366 that observed for the other six hybrid clones, which merges profiles of the two putative parents *L. minor*  
367 and *L. gibba*, was observed for LM0027 (not shown). Every putative hybrid clone is then heterozygous at  
368 all six  $\beta$ -tubulin loci (Braglia et al., 2021b). LM0027 groups together with the other six putative hybrid  
369 clones by cluster analysis of TBP markers, well separated from the clusters of each parental species (seven  
370 clones each, from different geographic areas were chosen as representative of the intraspecific genetic  
371 diversity, Fig S2). Sequences of both intronic regions of the  $\beta$ -tubulin locus *TUBB1* (Supplementary File  
372 1), amplified by specific primers, confirmed also for clone LM0027 the identity of each homoeologous  
373 alleles with the corresponding parental species, upon BLAST DNA analysis against the genome sequence  
374 of *L. gibba* 7742a and *L. minor* 9252, respectively ([www.lemna.org/blast](http://www.lemna.org/blast); accessed on 04/27/2023).  
375 BLAST DNA analysis of the nucleotide sequences obtained for the two plastid markers *psbK-psbI* (512  
376 bp) and *atpF-atpH* (529 bp) (Supplementary File 1) permitted to establish the parentage of the newly  
377 investigated clone LM0027, which turned out to have plastid marker sequences matching those of *L.*  
378 *minor*, and are almost identical to the four previously analysed hybrid clones 7641, 6861, 9562, 7320 (1  
379 SNP), thus having *L. minor* as the maternal parent. For the two remaining clones, 9248 and 9245a, their  
380 origin from the reciprocal cross was previously assumed from their plastid marker identity to *L. gibba*  
381 sequences (Braglia et al., 2021b).

382

### 383 **Genome size estimation and subgenome composition of hybrid clones**

384 Plant interspecific hybrids are in most cases polyploid but can be also diploid (homoploid) when the two  
385 different subgenomes are shared within the same nucleus without chromosome number increase (Abbott  
386 et al., 2010). The Relative Genome Size (RGS) of each *L. × mediterranea* clone was then assessed by

387 flow cytometry in comparison with that of the parental species and used as a proxy of ploidy (Table 2).  
 388 The five clones with *L. minor* as the maternal parent showed an average RGS of 0.54, exactly intermediate  
 389 between the values of the two diploid parental species (0.46 *L. minor*, 0.64 *L. gibba*), perfectly fitting  
 390 what expected for a homoploid hybrid. Conversely, the RGS of the two clones having *L. gibba* as the  
 391 maternal parent, 0.84, was about 1.5x larger, suggesting a triploid state. This led us to conclude that the  
 392 analysed clones belong to two different cytotypes, most likely a homoploid and a triploid one,  
 393 respectively. Both kinds of hybrids, although rarer than tetraploids or hexaploids, may occur in plants and  
 394 are generally considered as bridges toward higher ploidy levels, eventually leading to hybrid speciation  
 395 (Bretagnolle 1995; Tayalè and Parisod, 2013; Mason and Pires, 2015).

396

397 **Table 2.** Genetic structure of seven *L. × mediterranea* clones (hybrids) and parental species. G and M  
 398 refer to *L. gibba* and *L. minor* subgenomes, respectively. The estimated Relative Genome Size (RGS) and  
 399 the deduced ploidy are reported.

| ID     | Taxon by TBP             | plastid donor   | RGS   | ploidy | sub genome composition |
|--------|--------------------------|-----------------|-------|--------|------------------------|
| 7796   | <i>L. gibba</i>          | <i>L. gibba</i> | 0.650 | 2n     | GG                     |
| 7922   | <i>L. gibba</i>          | <i>L. gibba</i> | 0.620 | 2n     | GG                     |
| 5500   | <i>L. minor</i>          | <i>L. minor</i> | 0.460 | 2n     | MM                     |
| 7194   | <i>L. minor</i>          | <i>L. minor</i> | 0.450 | 2n     | MM                     |
| 9495   | <i>L. minor</i>          | <i>L. minor</i> | 0.460 | 2n     | MM                     |
| 7753   | <i>L. minor</i>          | <i>L. minor</i> | 0.460 | 2n     | MM                     |
| 6861   | <i>L. x mediterranea</i> | <i>L. minor</i> | 0.540 | 2n*    | MG                     |
| 9562   | <i>L. x mediterranea</i> | <i>L. minor</i> | 0.540 | 2n*    | MG                     |
| LM0027 | <i>L. x mediterranea</i> | <i>L. minor</i> | 0.541 | 2n*    | MG                     |
| 7320   | <i>L. x mediterranea</i> | <i>L. minor</i> | 0.539 | 2n*    | MG                     |
| 7641   | <i>L. x mediterranea</i> | <i>L. minor</i> | 0.538 | 2n*    | MG                     |
| 9248   | <i>L. x mediterranea</i> | <i>L. gibba</i> | 0.842 | 3n*    | GGM                    |
| 9425a  | <i>L. x mediterranea</i> | <i>L. gibba</i> | 0.839 | 3n*    | GGM                    |

\* deduced from genome size

400

401 Triploid hybrids may have two different subgenome compositions: MMG or GGM, depending on the  
 402 donor of the diploid gametes. Further analysis was then conducted in order to determine the subgenome  
 403 composition of each hybrid clone, by a modification of the DMAS qPCR technique (Lefever et al., 2019).  
 404 Genomic DNA of two clones for each parental species, the seven hybrid clones and six artificial hybrid  
 405 genomes (MG 1 and 2, GGM 1 and 2 and MMG 1 and 2) obtained by mixing genomic DNA of *L. gibba*





(B)

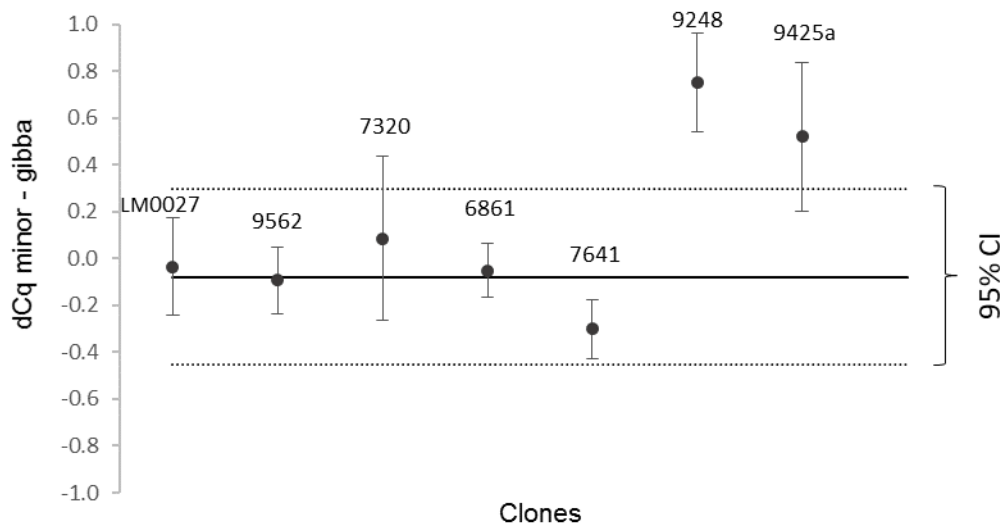

427

428 **Figure 2.** Homeolog-specific qPCR. (A) Representative PCR amplification plots of the parental species  
429 DNAs and their mixtures in different proportions (upper panel). Colours indicate the specific target of the  
430 primer pair used. (B) Scatter plot of the Cq differences between the perfect match and mismatch reactions  
431 for each *L. × mediterranea* clone (n=3). Horizontal lines indicate the mean value of the five diploid  
432 samples and the 95% Confidence Interval ( $\pm 2SD$ ).

433

#### 434 **Genome diversity by AFLP analysis**

435 AFLP analysis of seven clones for each group (parents and putative hybrids) already analysed by TBP  
436 provided confirmation of hybridization at the whole genome scale. In this regard, the AFLP analysis  
437 yielded 1671 markers, 98% of which were polymorphic considering 21 duckweed clones. The number of  
438 polymorphic markers within the groups of clones of *L. minor* and *L. gibba* was 896 (54%) and 856 (51%)  
439 respectively, significantly higher than those estimated within the third group of clones (*Lemna ×*  
440 *mediterranea*) that revealed only 21% of polymorphism. Accordingly, the lowest number of private  
441 markers, 37, was found in this latter group, compared to 456 and 354 private markers detected for *L. minor*  
442 and *L. gibba* groups respectively, reflecting the conspicuous number of loci shared between the putative  
443 hybrid group and both parents. In addition, mean genetic diversity estimated within taxa (HS) was 0.1059  
444 in *L. gibba*, 0.0750 in *L. minor* and 0.0221 in *L. × mediterranea*. Conversely the Nei's (1973) between-  
445 population gene diversity ( $G_{ST}$ ) value was significantly higher ( $p < 0.05$ ) comparing each other the *L.*  
446 *minor* and *L. gibba* groups (0.2638), than comparing *L. × mediterranea* to either of the two parents (0.1224  
447 and 0.1160 to *L. minor* and *L. gibba*, respectively). In this context, the diagram of the Pearson's linear  
448 correlation (Fig. 3) estimated among all analysed clones returned the highest significantly ( $p < 0.05$ )

449 recorded values among the accessions of *L. × mediterranea*, forming a group of clones strongly related to  
 450 each other, while the lowest correlation was assessed among *L. gibba* clones.

451

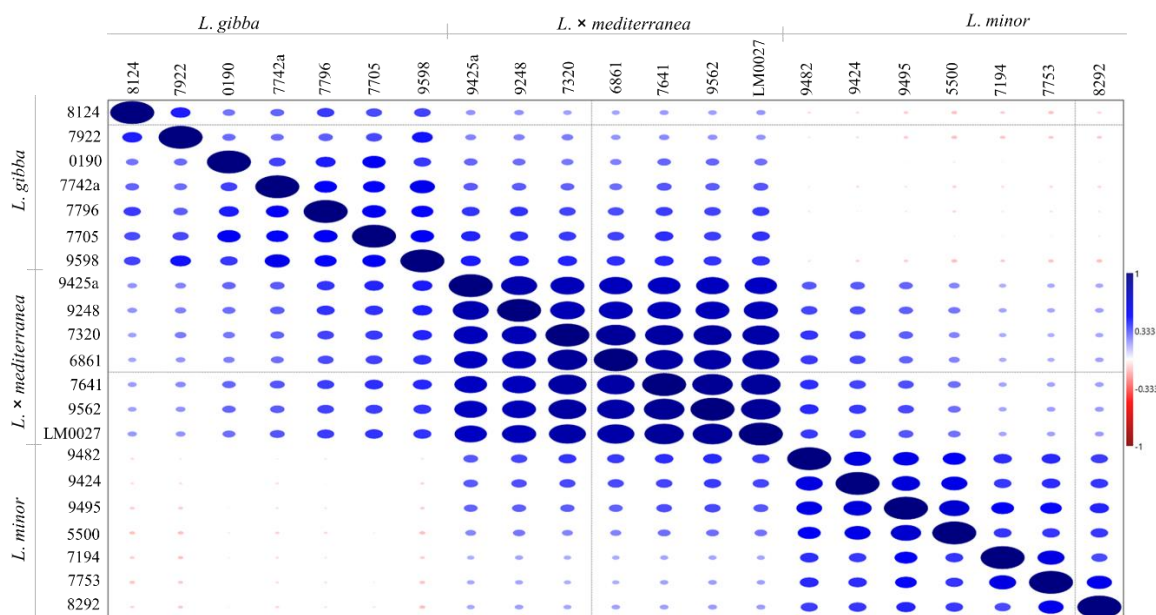

452

453 **Figure 3.** Pairwise Pearson's correlation matrix, comparing parental and putative hybrid genotypes. Clone  
 454 numbers refer to those reported in Table 1.

455

456 The total variance accounted for by each component of the PCA (PC1 37% - PC2 21%) in Fig. S3 grouped  
 457 the analysed clones in three distinct, non-overlapping and well-defined clusters, further highlighting that  
 458 a representative quote of the total genetic variability (52%) can be attributed to variability detected among  
 459 groups.

460 Neighbour-net analysis (Fig. 4) also supported the existence of differentiated groups of individuals.  
 461 Despite the evident reticulation, three diverging groups were formed by a strongly supported split  
 462 (bootstrap values: 87, 90 and 100%): two of these correspond to the *L. minor* and *L. gibba* groups of  
 463 clones, considered as the parental species involved in the cross, whereas a third group, located between  
 464 the other two, represents an isolated entity formed by the seven clones of *L. × mediterranea* taken into  
 465 account as the derived hybrid. A substantial amount of reticulation particularly occurred within parental  
 466 groups, reflecting the geographic partition (America, Europe, India and Africa) (Table 1) characterizing  
 467 the selected clones, accounted as representative of the two species. Moreover, within the *L. ×*  
 468 *mediterranea* group two sub-branches were observed, in accordance with the already documented  
 469 different chloroplast origin (coloured lines in Fig. 4) and subgenome composition (GGM, triploid) of two  
 470 of the seven hybrid clones (9248 and 9425a).

471

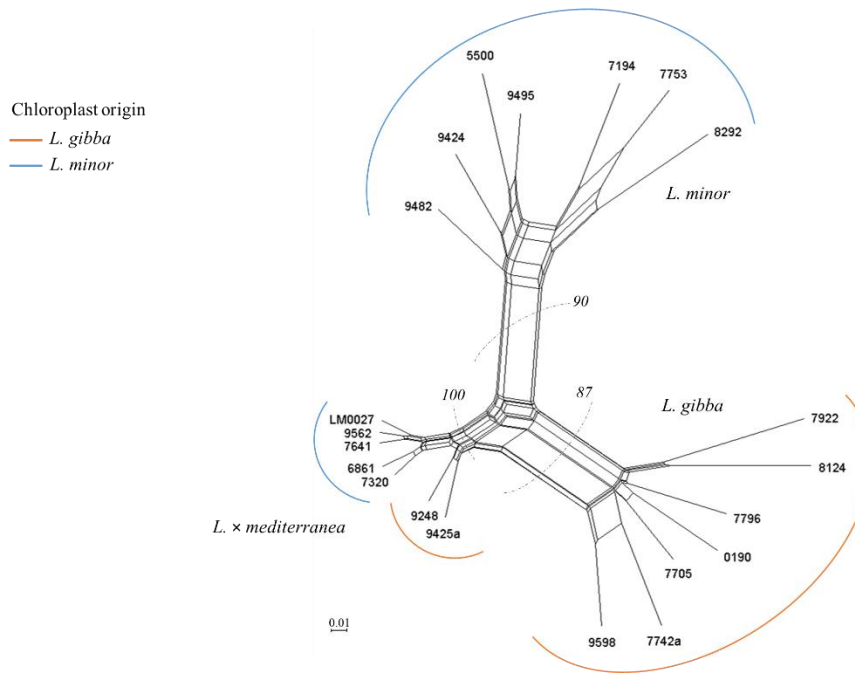

472

473 **Figure 4.** Phylogenetic network (NeighborNet) constructed on the AFLP patterns. Bootstrap values are  
474 given for the main clusters. Grouping by colours is made according to the maternal parentage determined  
475 by plastid markers.

476

477 The Structure analysis with the reduced dataset (694 loci) reinforces the origin of the putative hybrid  
478 individuals. According to the delta K method, the highest probability of dividing the data set into two  
479 clusters correlates with the two parent species. The putative hybrid individuals show an approx. 50%  
480 affiliation to each of the two clusters of the parent species (Fig. 5) and they would even be assigned to  
481 their own cluster if three clusters were assumed. Strikingly, the two individuals with GGM genome  
482 composition show a further deviation from the hybrid cluster when assuming 4 clusters.

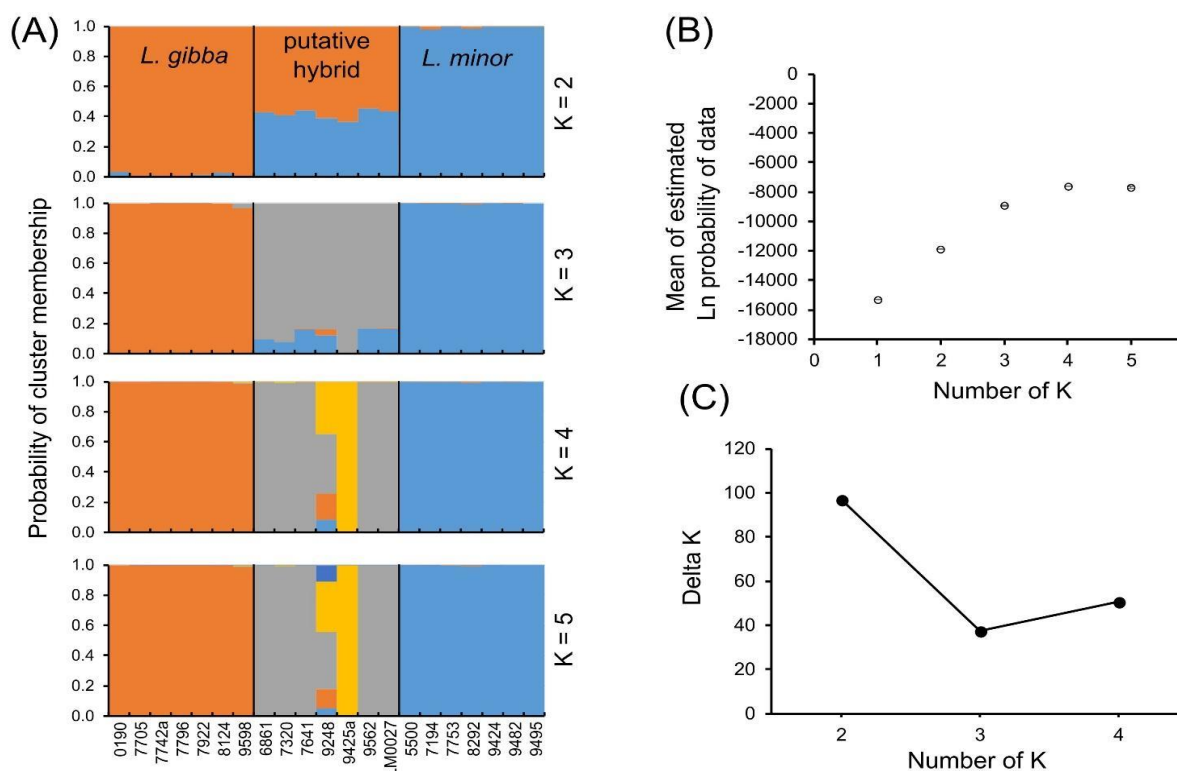

483

484 **Figure 5.** Results of the Structure analysis based on the reduced AFLP dataset. (A) Cluster membership  
 485 of the 21 investigated clones for the number of clusters K=2-5. (B) Mean Ln probability values and their  
 486 standard deviations from the 10 independent Structure runs for K=1-5. (C) Results of the Delta K method,  
 487 showing the highest value for K=2.

488

489 These results are further supported by the analysis with NewHybrids (Table S3). All putative hybrid  
 490 individuals were categorized as F1 hybrid crosses between *L. gibba* and *L. minor*. There was no  
 491 assignment to the F2 or either backcross category.

492

### 493 Morphological diversity

494 To compare morphological diversity between *L. × mediterranea* and the parental species, two diploid  
 495 clones of Mediterranean origin, more closely related to the hybrids, were chosen as representative of each  
 496 parental species *L. gibba* (GG) and *L. minor* (MM). Morphological analysis of 10 fronds of each clone of  
 497 the two parents, as well as the two hybrid cytotypes, showed that the two hybrid classes, triploid (GGM)  
 498 and homoploid (MG), are distinct not only genetically but also morphologically, despite large trait  
 499 overlaps with one other and with parental species (Fig. 6A).

500 Most of the morphological traits considered are useful in differentiating between the four *Lemna* groups  
 501 (Table S4). Such differences are more marked between the two parental species than between them and

502 the two hybrid cytotypes. There are significant differences between the two hybrid cytotypes particularly  
 503 in quantitative traits (Fig. 6B), while for qualitative ones, there are several overlaps (Fig. 6C; Table S4).  
 504

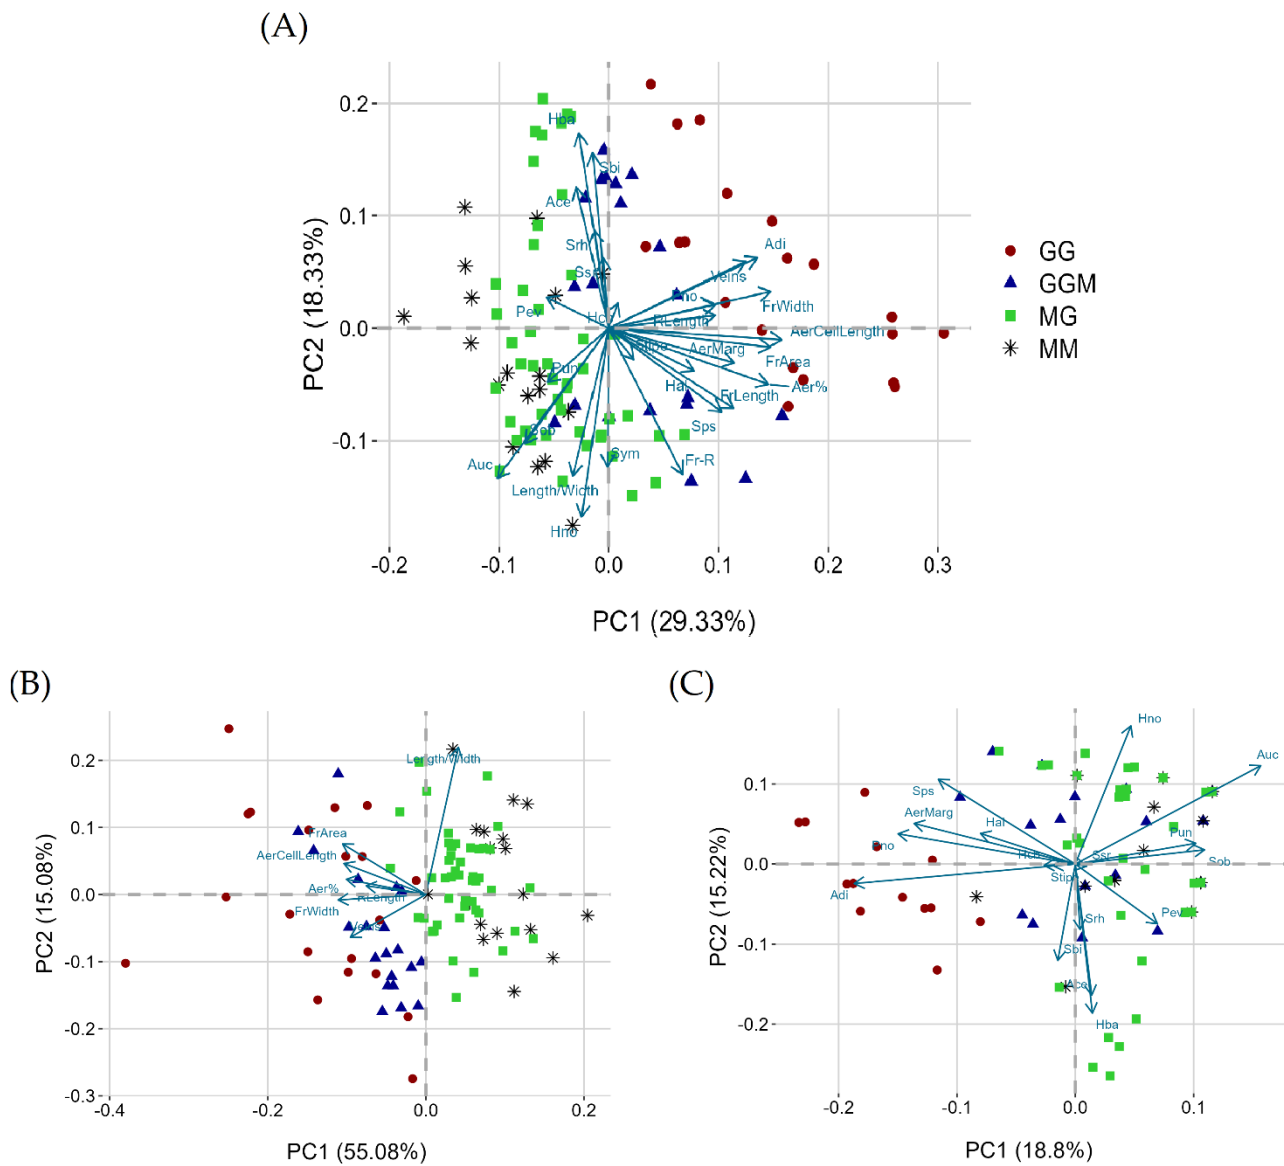

505  
 506 **Figure 6.** PCA based on all considered morphological traits for the 11 investigated clones (10 fronds  
 507 each) (A). Quantitative (B) and qualitative (C) morphological traits statistically significant from ANOVA  
 508 and Chi-squared tests, respectively, are shown. Acronyms for quantitative traits: FrLength = frond length,  
 509 FrWidth = frond width, Length/Width = frond length/width ratio, FrArea = frond area, Veins = vein  
 510 number, RLenght = root length, Fr-R = distance frond base-root base, Aer% = aerenchyma percentage  
 511 coverage in frond, ArCellLength = aerenchymatic cell length. For qualitative traits: Sbi = bilobate  
 512 irregular frond shape, Sob = obovate shape, Sps = pear-shaped, Srh = rhomboid shape, Ssr = stocky  
 513 rhomboid shape; Hal = all around hyaline frond edge, Hba = basal hyaline edge, Hcb = central-basal  
 514 hyaline frond edge, Hno = no hyaline hyaline edge, Ace = central aerenchyma position, Adi = dispersed

515 aerenchyma, Auc = upper-central aerenchyma, AerMarg = aerenchyma reaching the frond edge, Pno =  
516 absent papules, Pun = unclear papules, Pev = evident papules.

517

518 All the quantitative morphological traits considered, except aerenchymal cell length, showed significant  
519 differences between the two hybrid cytotypes (Fig. 7, Table S5). GGM fronds differed significantly from  
520 MG for: larger surface (7.90 vs 6.53 mm<sup>2</sup>), higher width (2.87 vs 2.54 mm), higher aerenchyma abundance  
521 (72.50 vs 54.60 %), longer roots (5.87 vs 2.81 mm) and a higher number of veins (5.00 vs 3.8), on average.  
522 Conversely, GGM and MG did not show any significant difference from the maternal species *L. gibba*  
523 and *L. minor*, respectively, in relation to some quantitative parameters (frond area, frond length/width  
524 ratio, root length); in addition, GGM did not differ significantly from *L. gibba* for frond width (Fig. 7,  
525 Table S5).

526

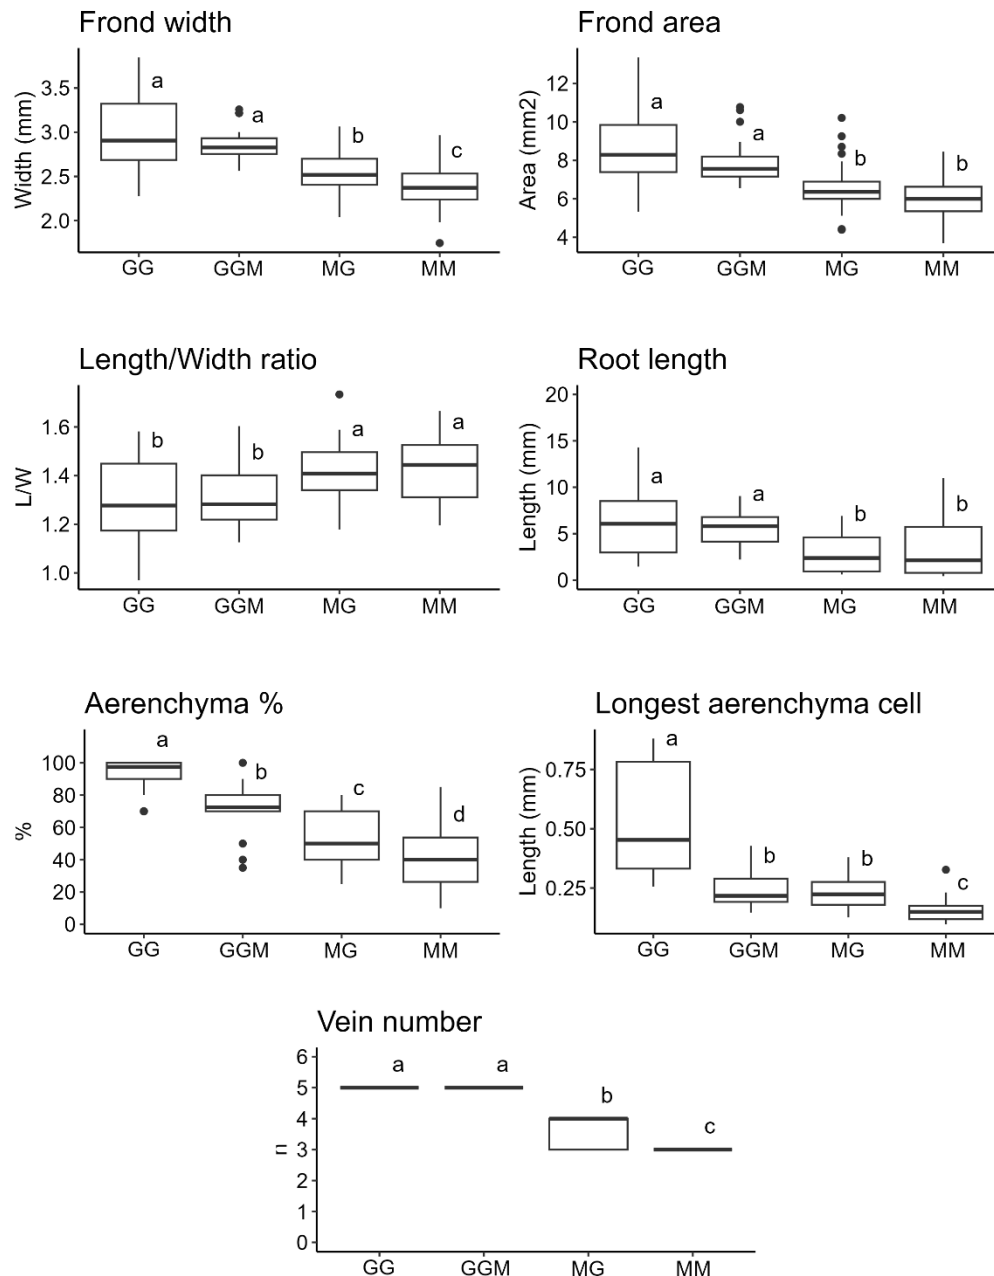

527

528

529 **Figure 7.** Differences among the four *Lemna* groups in relation to quantitative traits found to be significant  
530 by ANOVA test. In each graph, boxplots with different letters represent significant differences at p value  
531  $\leq 0.05$ .

532

533

534 Although there were significant differences in qualitative morphological traits between the four  
535 genetically distinct groups of *Lemna* clones studied, several overlaps for these traits were found between  
536 the two hybrid cytotypes (Fig. 8). Thus, this set of traits contributes less to differentiating the two hybrid  
537 cytotypes. With specific reference to the frond shape, the pyriform shape occurred in all the groups except

538 for *L. minor*, which had a predominantly obovate shape; a stocky rhomboid shape was absent only in *L.*  
 539 *gibba*. A frond edge completely hyaline all round was characteristic of *L. gibba* and GGM while it was  
 540 very sporadic in *L. minor* and MG. A total absence of the hyaline edge was mainly found in both *L. minor*  
 541 and MG, while it was sporadic in *L. gibba*. Elongated stipes, stolon-like appendage connection daughter  
 542 and mother fronds, occurred in all *Lemna* groups, except for *L. minor*. Only in *L. gibba*, aerenchyma was  
 543 dispersed throughout most of the frond area where generally it reached the edge, while in the other groups  
 544 it was mostly in an upper-central position. Furthermore, only in a few individuals of the MG hybrid and  
 545 *L. minor*, a centrally located aerenchyma was found. The papules trait also exclusively differentiated *L.*  
 546 *gibba* from the other *Lemna* groups since papules were always absent in *L. gibba* and generally most  
 547 evident in the MG cytotype, followed by *L. minor* and finally the GGM cytotype.

548

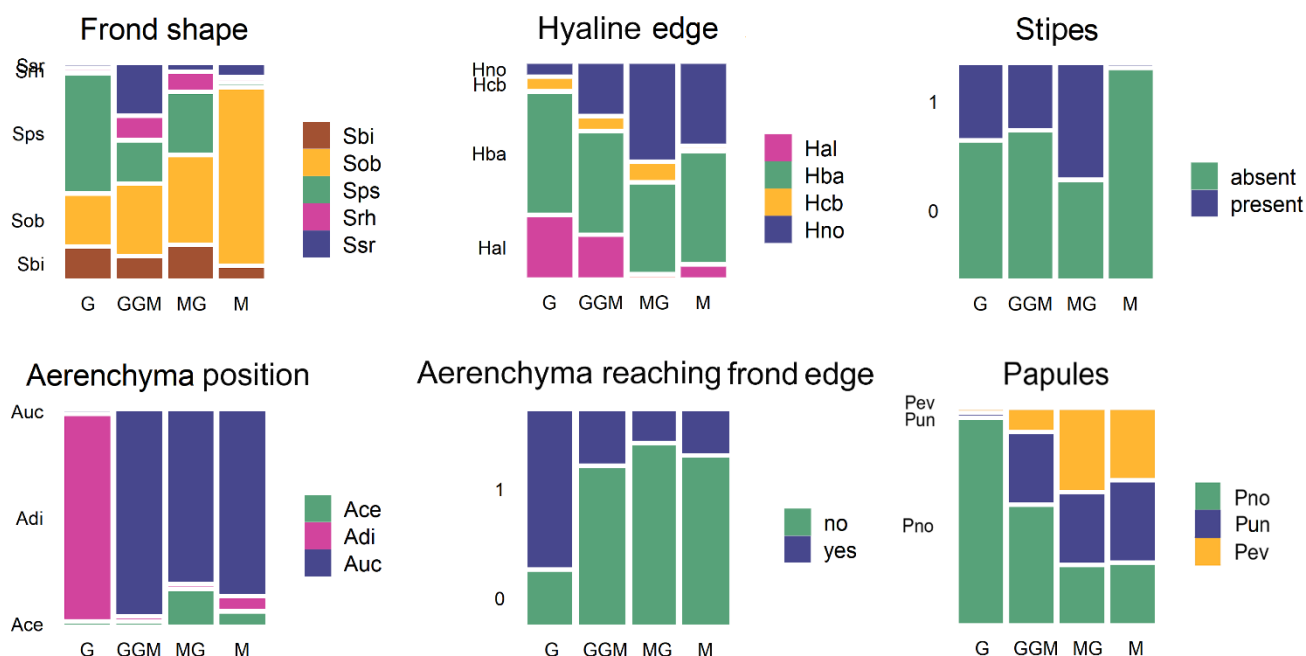

549

550 **Figure 8.** Differences among the four *Lemna* groups in relation to qualitative traits found to be significant  
 551 by Chi-squared test (Mosaicplots). Acronyms for frond shape (Sbi = bilobate irregular shape, Sob =  
 552 obovate, Sps = pear-shaped, Srh = rhomboid, Ssr = stocky rhomboid); hyaline frond edge (Hal = all around  
 553 hyaline, Hba = basal, Hcb = central-basal, Hno = no hyaline); stipes present or not (absent); aerenchyma  
 554 position (Ace = central, Adi = dispersed, Auc = upper-central aerenchyma); aerenchyma reaching (yes)  
 555 or not (no) the frond edge; papules (Pno = absent, Pun = unclear, Pev = evident).

556

### 557 Frond vascular organization

558 Differences in the simplified vascular tissues were observed comparing cleared frond specimens across  
 559 the eleven *Lemna* clones considered. In Fig. 9, representative stereomicroscope images of fronds show



560 visible interior veins within the body of the thallus. In particular, in *L. minor* 5500 a central vein and two  
561 lateral veins arising from the point of root attachment were present while in *L. gibba* 7742a five veins  
562 branched off from the node as reported in literature (Landolt, 1986; Bog, et al., 2019). MG hybrid  
563 cytotypes (e.g. 7641 and LM0027) exhibited from three to four veins per frond while GGM hybrid  
564 cytotypes predominantly revealed five veins as the maternal parent species  
565

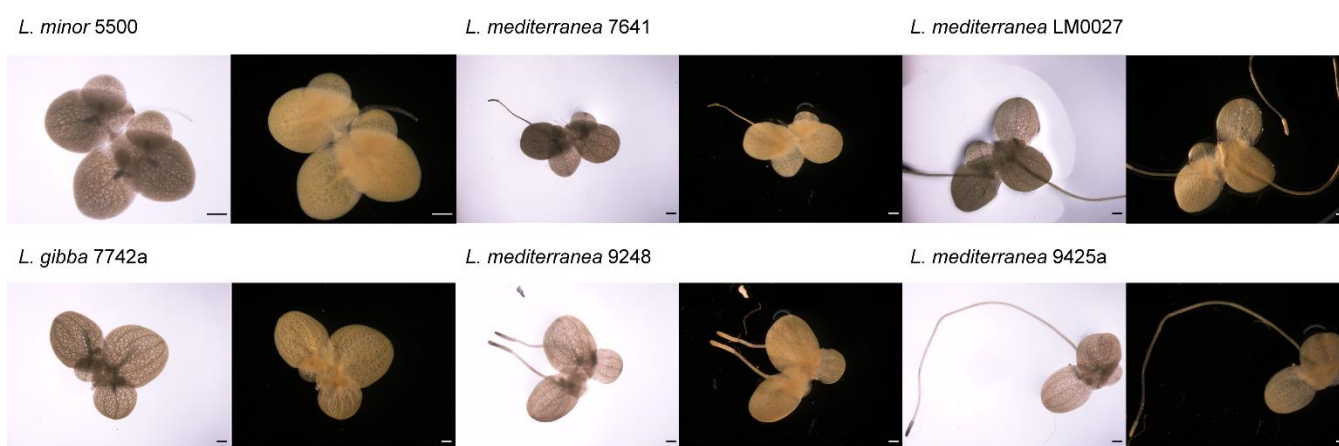

566  
567 **Figure 9.** Representative stereomicroscope images of cleared fronds colonies for the determination of  
568 veins number per frond in the two parental species, *L. minor* 5500 and *L. gibba* 7742a, and in both *L. ×*  
569 *mediterranea* cytotypes, homoploid (MG-7461 and -LM0027) and triploid (GGM-9248 and -9425a).  
570 Fronds colonies were observed under bright- and dark-field conditions. Bar = 1mm

### 571 572 **Stomatal traits**

573 Stomatal density can be an indicator of the level of adaptation to environmental conditions. Stomatal size  
574 and density are dramatically impacted by growth environment factors, including light intensity, water  
575 stress, and CO<sub>2</sub> concentration elevation. Measurement of stomatal size and density is summarized in  
576 Fig.10. In *L. minor*, stomatal density and size were correlated as the observed reduced stomatal density  
577 corresponded to a lower stomatal size. In particular, stomatal density and size in *L. minor* were  
578 significantly lower when compared to *L. × mediterranea* MG. The highest stomatal density was observed  
579 in the diploid MG. *L. gibba* and the triploid *L. × mediterranea* GGM did not significantly differ in stomatal  
580 density, also with respect to *L. minor* and MG. *Lemna minor* presented the smallest stomatal size, and  
581 GGM showed the highest. This is consistent with the fact that GGM clones have a higher DNA content  
582 than diploids, which usually correlates with cell size (McGoey et al., 2014; Da Silva et al., 2020).

583

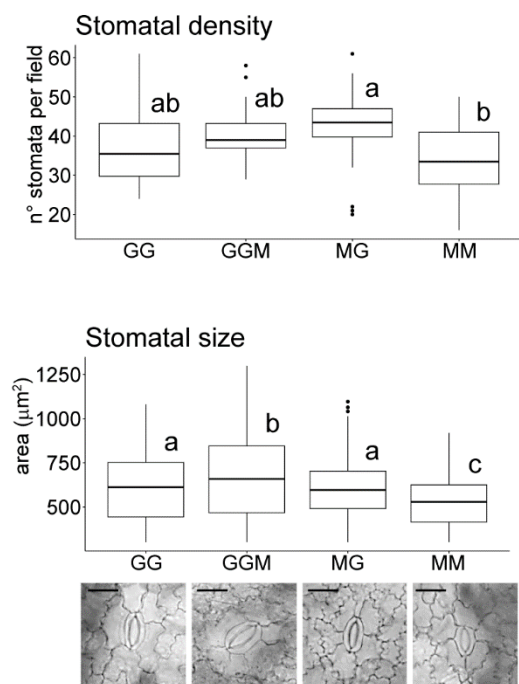

584

585 **Figure 10.** Differences in stomatal traits between the two parental species, *L. minor* (MM) and *L. gibba*  
586 (GG), and the two *L. × mediterranea* cytotypes, (MG and GGM): stomatal density (above) and size  
587 (below). Box plots labelled with different letters indicate significant differences between grouped *Lemna*  
588 species and hybrid cytotypes (ANOVA followed by Tukey HSD,  $p < 0.05$ ).  $n = 3$ . Representative  
589 examples of stomatal morphology (bottom) in each of the corresponding groups photographed by optical  
590 microscopy. Bars = 30  $\mu\text{m}$

591

### 592 **Plant growth and biochemical characterization**

593 The biochemical analysis (pigment and protein content), and plant growth parameters (RGR, frond fresh  
594 weight) showed that the two *L. × mediterranea* cytotypes exhibit their own independence and greater  
595 association to one of the parental species, as it is shown by PCA (Fig.11). PCA performed on the dataset  
596 captured 89.7% of the cumulative variance using the parameters influencing the first two principal  
597 components. The outcomes of PCA clearly discriminated *L. minor* (MM) and homoploid hybrid clones  
598 MG from *L. gibba* (GG) and triploid hybrids GGM. The profile of *L. minor* and MG clustered in a PC1-  
599 negative direction while *L. gibba* and GGM clustered in a PC1-positive direction.

600

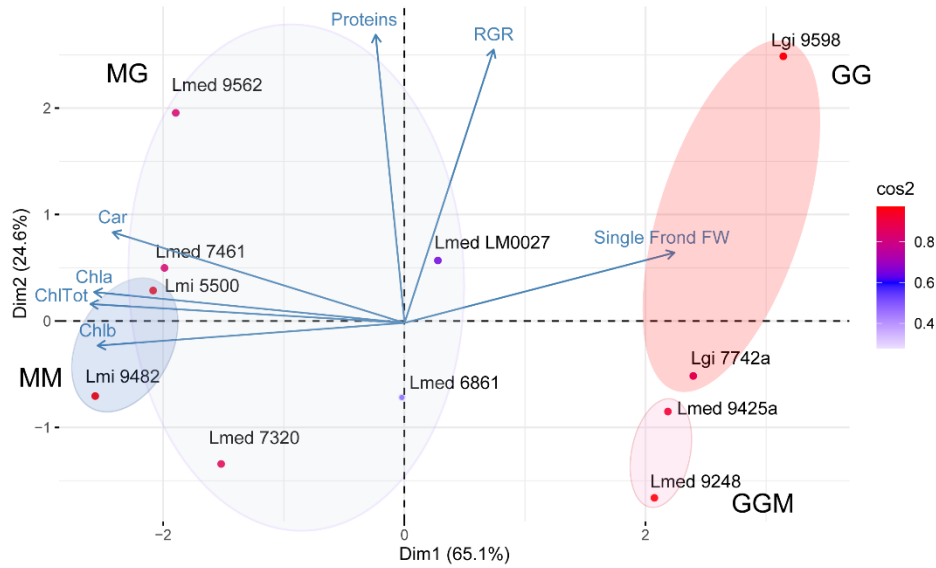

601

602

603

604

605

606

607

608

609

610

611

612

613

614

615

616

617

618

619

620

621

622

623

624

**Figure 11.** Principal component analysis (PCA) of the measured growth data and biochemical parameters: Relative Growth Rate (RGR), proteins, chlorophylls (ChlTot - Chla - Chlb), carotenoids (Car) and Single Frond Fresh Weight - (Single Frond FW) of the two parental species, *L. minor* (MM) and *L. gibba* (GG), and the two *L. × mediterranea* hybrid cytotypes (MG and GGM). Plot for PC1 and PC2, where each oval encompasses the observed pattern of variance of each *Lemna* clone under the first two principal components clustering separately MM and MG (blue ovals) and GG and GGM (pink ovals), respectively. Measured parameters are summarized as boxplots in Fig.12. No significant differences were found between *L. gibba* and triploid hybrids GGM in photosynthetic pigment content. The chlorophyll *a* content differed significantly between *L. gibba* and GGM hybrids compared to *L. minor* and MG hybrids, respectively. Furthermore, for chlorophyll *b* and carotenoid content significant differences were found between *L. minor* and hybrid cytotype homoploid MG and in respect to *L. gibba* and the hybrid cytotype triploid GGM. *Lemna minor* (*L. minor* 5500 and *L. minor* 9482) had the highest pigments content. The estimated fresh weight of single frond of *L. gibba* is significantly different with respect to *L. minor* and to both *L. × mediterranea* cytotypes. No significant differences were found between *L. minor* and the homoploid cytotype MG. Equally high growth rates under the tested conditions were shown inter- and intra- the two species, *L. minor* and *L. gibba* and the two hybrid cytotypes MG and GGM. In particular, RGR in the period under study ranged from 0.17 to 0.25 g<sup>-1</sup> day<sup>-1</sup> for *L. gibba* and 0.17-0.18 g<sup>-1</sup> day<sup>-1</sup> for GGM clones, while 0.16 to 0.18 g<sup>-1</sup> day<sup>-1</sup> for *L. minor* and 0.16 to 0.22 g<sup>-1</sup> day<sup>-1</sup> for MG. These RGRs values agree with data reported in literature, which are situated around 0.1 d<sup>-1</sup> up to 0.3 d<sup>-1</sup> (Zhang et al., 2014; Van Echelpoel et al., 2016). In the hybrid triploid cytotype, GGM, the protein content was lower and significantly different compared to the homoploid cytotype MG and to the two parental species. Among the analysed accessions, *L. gibba* 9598 showed the highest values for single frond fresh weight, RGR and protein content.

625

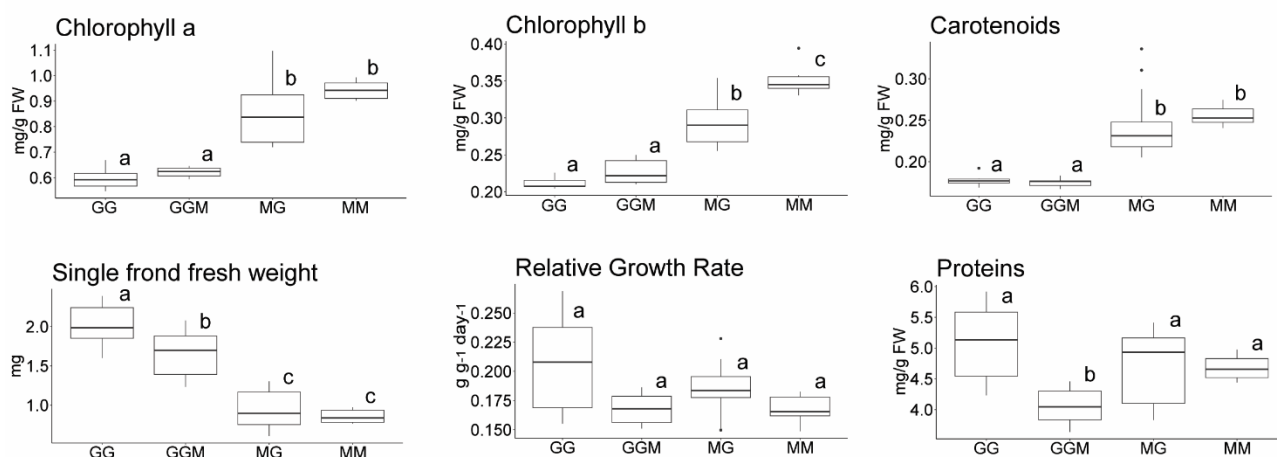

626 **Figure 12.** Differences in photosynthetic pigment content, single frond fresh weight, relative growth rate  
627 (RGR) and protein content between the two parental species, *Lemna minor* (MM) and *L. gibba* (GG), and  
628 the two *L. × mediterranea* hybrid cytotypes MG and GGM. Box plots labelled with different letters  
629 indicate significant differences between different grouped *Lemna* species and hybrid cytotypes (ANOVA  
630 followed by Tukey HSD, p value ≤ 0.05). n = 5

631

### 632 Taxonomy

633 A natural interspecific hybrid between *L. minor* and *L. gibba* is described here:

634 ***Lemna × mediterranea*** L. Braglia & L. Morello, hybrida nova, *L. minor* × *L. gibba*

635 **Type:** Italy. Umbria Region, Passignano on the Trasimeno Lake (4310.948, 1209.297, 257 m elevation)  
636 [clone 9562], collected in 2011 by F. Landucci. Fig. 13a, b.

637 Specimens of the holotype as well as all the other six clones described in the present paper are being  
638 deposited at the Central Herbarium of Italy, at the University of Florence. Specimens of the same clones,  
639 except for LM0027, are also present in a large herbarium on duckweeds assembled by Prof. E. Landolt (†  
640 1921-2013) which is presently held privately in Zurich by Mr. W. Lämmli.

641 **Synonym:** ‘*Lemna symmeter*’ G. Giuga [Giuga G., 1973; “Vita segreta di Lemnacee I. *Lemna symmeter*  
642 G. Giuga-species nova”, Tip. Di Blasio, Naples], pro sp., nom. non rite publ. (nec descr. Lat., non typ.).  
643 Supplementary Figure 4. This name was previously considered as a synonym of *L. gibba* L. (Sree et al.,  
644 2016). Moreover, as no Latin description was present, it was not effectively published according to the  
645 requirements of the *International Code*. In any case, ‘*L. symmeter*’ is not grammatically correct Latin (the  
646 correct adjective should have been *symmetrica*, meaning symmetric). No authentic specimens of ‘*L.*  
647 *symmeter*’ have been recorded in any official herbaria to our knowledge, so this synonymy cannot be  
648 unquestionably ascertained.

649

## 650 **Morphological description**

651 Morphological characters are intermediate between the two parental species *L. minor* and *L. gibba*, with  
652 greater morphometric similarity to *L. minor*. As for frond shape, this hybrid shows a variable morphology,  
653 even if the obovate shape is slightly more frequent than others. Fronds have an average length of 3.60 mm  
654 (2.71– 4.87 mm), width of 2.54 mm (2.04 – 3.07 mm) and an area of 6.53 mm<sup>2</sup>. No evident gibbosity is  
655 observed. The number of visible veins is from 3 to 4. Similar to *L. minor*, several serially arranged papules  
656 are often visible along the mid vein on the adaxial frond surface. Sometimes there is an additional,  
657 prominent, isolated papule positioned near the tip of the frond. The aerenchyma is mainly localized in the  
658 mid-upper part of the frond, covering on average ca. 54.60% of the frond area. Average length of the  
659 longest aerenchyma cells is 0.23 mm (0.13–0.38). The mean root length is 2.81 mm with a maximum  
660 value of 6.91 mm. Over 50% of the analysed fronds showed elongated stipes connecting daughter fronds.

661

662 **Ploidy:** as inferred by comparison of the relative genome size with that of the parental species, the hybrid  
663 type is homoploid (MG). Karyotyping is needed for full confirmation.

664

665 *Lemna* × *mediterranea* – reversed cross *L. gibba* × *L. minor* (Fig. 13 c-d)

666 Morphological analysis of the two clones genetically attributable to this cytotype shows that it also  
667 exhibits intermediate characters between the two parental species, while showing greater morphological  
668 similarity to *L. gibba*, in accordance with the double genetic contribution of this latter. In this hybrid, the  
669 frond shape is variable, not showing one shape predominant over the other; fronds are larger than the  
670 diploid, with an average length of 3.74 mm (3.24 - 4.82), width of 2.87 mm (2.56 - 3.26), and total area of  
671 7.90 mm<sup>2</sup>. No evident gibbosity is observed. The number of visible veins is predominantly 5. On the  
672 adaxial frond surface, some serially arranged papules are sometimes visible in a hinting manner.  
673 Aerenchyma tissue is developed mainly in the mid-upper portion of the frond and covers on average  
674 72.50% of the area, never reaching the frond margin. Average aerenchymal cell length is 0.25 mm (0.15  
675 - 0.43). The mean length of roots is 5.87 mm with maximum value of 11.15 mm. In 30% of the samples  
676 analysed, the presence of elongated stipes connecting neighbouring fronds was observable at the base of  
677 the frond. Guard cells are larger than in the diploid cytotype.

678 **Ploidy:** both clones representing this cytotype are triploid, with two subgenomes acquired from the  
679 maternal parent *L. gibba* (GGM), as deduced from qPCR analysis. Karyotyping will provide further  
680 confirmation.

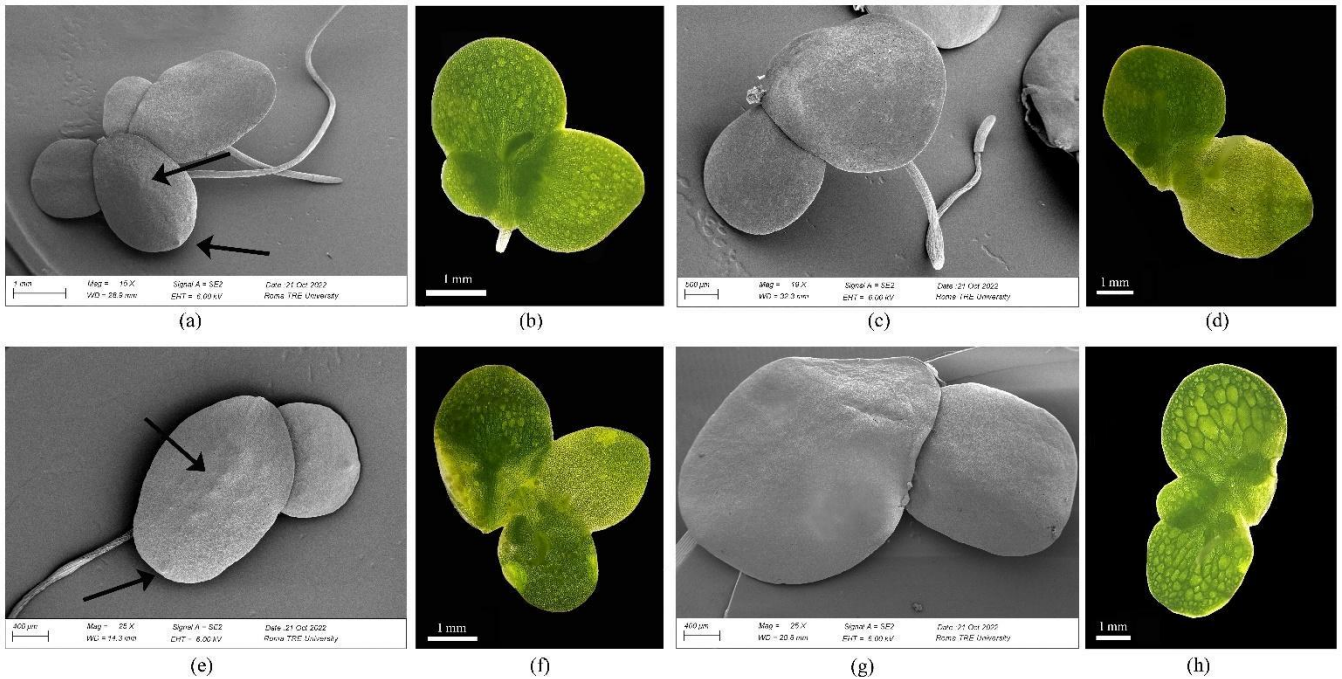

681

682 **Figure 13.** Representative images of the hybrids *L. × mediterranea* - homoploid cytotypic (MG), clone  
683 9562 (a-b) *L. × mediterranea* - triploid cytotypic (GGM), clone 9425a (c-d) and the parental species, *L.*  
684 *minor* (e-f), *L. gibba* (g-h) at scanning electron microscopy (left) and stereoscope (right). In detail: adaxial  
685 frond surface (a, c, e, g) and abaxial frond surface with visible aerenchyma (b, d, f, h). Dark arrows indicate  
686 serial or terminal papules on the adaxial frond surface (a, e).

687

688 **Diagnosis (Recognition):** Because of the wide phenotypic plasticity, the existence of two different  
689 cytotypes, and the presence of intermediate morphological traits with respect to the parental species, no  
690 dichotomous key can be developed for the straightforward recognition of the hybrid *L. × mediterranea*.  
691 Although all hybrid clones in the original Landolt collection were classified as *L. gibba* by morphology,  
692 the morphometric analysis performed here showed a closer overall similarity of the homoploid hybrid to  
693 *L. minor*, and the triploid hybrid to *L. gibba*. As morphological recognition of *L. × mediterranea* is almost  
694 impossible, diagnosis must then rely on molecular markers. Since plastid markers are of no help, we  
695 suggest tubulin intron amplification (*TUBB1* and *TUBB2*) followed by agarose gel electrophoresis as a  
696 very simple molecular method for fast identification, as described in Braglia et al., 2021b. Such analysis  
697 is suggested every time a *Lemna* specimen cannot be assigned with accuracy to either *L. minor* or *L. gibba*.

698 **Distribution:** The geographical origin of the seven hybrid specimens is reported in Fig. 14. All but one  
699 of them, which was sampled in the North of Germany, come from Mediterranean countries: four from  
700 Italy (at different latitudes), one from Israel and one from Egypt.

701 Among a total of 23 *L. gibba* and 48 *L. minor* specimens from our present collection and coming from all  
702 continents, no other hybrid clone was found. This fact suggests a rather restricted distribution of *L. ×*

703 *mediterranea* despite wide overlaps in the geographic distribution of *L. gibba* and *L. minor* and the co-  
704 occurrence of the two species in the phytosociological alliance *Lemnion minoris* at many sites of Europe,  
705 South-western Asia, Africa and California (Landolt, 1986).

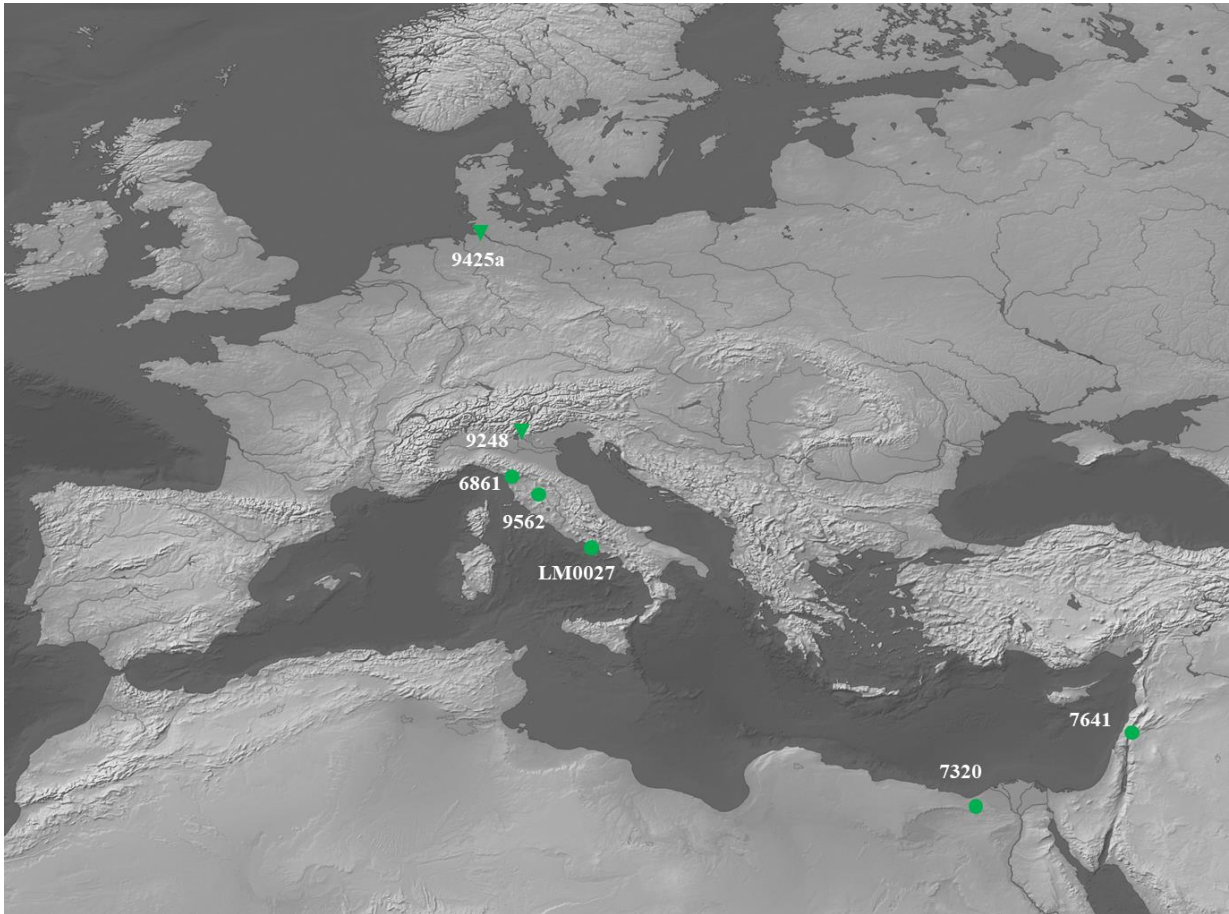

706  
707 **Figure 14.** Geographical origin of the seven *L. × mediterranea* specimens. Circles indicate homoploid  
708 hybrids MG, triangles indicate triploid GGM clones.

709  
710 **Etymology:** The specific epithet refers to the collection sites of six out of the seven investigated  
711 specimens, coming from three different Mediterranean countries

712 **Conservation status:** Not known. All clones investigated were from *ex situ* germplasm collections.  
713 However, collection dates of the seven clones span nearly 70 years, from 1954 to 2006, suggesting either  
714 recurrent hybridization or population stability. Field research is ongoing in some of the areas where hybrid  
715 clones were collected.

716 **Fertility:** Not known. Flowering of ‘*L. symmeter*’ was reported as common by G. Giuga, both in the wild  
717 and in quasi-natural conditions (samples collected in the wild and grown in water outdoors), producing  
718 indehiscent, sterile anthers (Giuga, 1973). This agrees with the fact that both genomic arrangements,  
719 homoploidy and triploidy, are generally associated with the absence or a severely reduced fertility in other  
720 plant species (Rieseberg et al., 2007). Trials to induce flowering are ongoing to confirm sterility.

## 721 **Morphological description of the parental species**

722 For comparison, we provide a description of the parental species. Not all the features reported are in full  
723 agreement with those described in literature as our description is limited to few European clones, since  
724 long cultivated *in vitro*.

725

### 726 ***Lemna minor*** (Fig. 13 e-f)

727 Fronds of *L. minor* show a predominantly obovate shape (never pyriform), averagely 3.4 mm (2.5 – 3.9  
728 mm) long and 2.4 mm (1.75 – 3.0 mm) wide, with an area of 6.0 mm<sup>2</sup> (3.7–8.45 mm), on average smaller  
729 than *L. gibba*. The number of veins is predominantly 3. Several serially arranged papules are often visible,  
730 sometimes prominently, on the adaxial frond surface. Often there is an additional isolated papule near the  
731 frond tip (Fig. 13e). Aerenchyma is localized in the mid-lower part of the frond and is covering on average  
732 40% of the frond area. Average length of aerenchyma cells is 0.16 mm (0.10–0.33 mm). The maximum  
733 root length recorded was 11 mm. Absence of stipes connecting contiguous fronds within a cluster.

734

### 735 ***Lemna gibba*** (Fig. 13 g-h)

736 Based on morphological analysis, *L. gibba* is characterized by having predominantly pyriform fronds, on  
737 average 3.9 mm long (2.6–5.1) and 3 mm wide (2.3–3.8), with a total area of 8.5 mm<sup>2</sup> larger than *L.*  
738 *minor*. The number of visible veins is 5. No papules are visible on the adaxial frond surface. Highly  
739 developed aerenchyma tissue covering on average more than 90% of the frond area and generally reaching  
740 its edge. Average length of aerenchyma cells, 0.53 mm (0.26–0.88). Maximum measured root length was  
741 35.4 mm. Sometimes (35%), formation of elongated stipes connecting daughter to mother fronds.

742

## 743 **DISCUSSION**

744

745 Multiple molecular data provided definite evidence that *L. minor* and *L. gibba* can spontaneously  
746 hybridize in nature, confirming previous data obtained by TBP analysis (Braglia et al., 2021). An example  
747 of hybridization between these two species is here given by the first description of the new nototaxon,  
748 *Lemna* × *mediterranea*, up to now overlooked. This hybrid likely corresponds to the taxon described (not  
749 validly) as the new species '*L. symmeter*' by G. Giuga (G. Giuga, 1973), although its hybrid nature was  
750 not suspected by the author. Hybridization was instead hypothesized by Kandeler (Kandeler, 1975) while  
751 reporting that the proposed taxon *L. symmeter* stands between *L. gibba* and *L. minor* and might even be a  
752 sterile hybrid between these two *Lemna* species. The description of *L. × mediterranea* underscores how  
753 in this hybrid there is the appearance of intermediate morphological traits between the two parental  
754 species, a common event in hybrids that often makes their morphological discrimination from the parental



755 species challenging. Despite limited morphological differences between hybrids and parental species,  
756 morphometric analysis of several traits is in agreement with genetic analysis in supporting a clear  
757 distinction of *L. × mediterranea* and also in separating the two cytotypes, homoploid (MG) and triploid  
758 (GGM). Paradoxically, each of the two cytotypes is more similar to one of the parental species than to the  
759 reciprocal hybrid. Whether this could be actually considered as a maternal effect or a gene dosage effect  
760 remains to be established.

761 The first cytotype is more closely related to *L. minor* while the second to *L. gibba*. The more distinctive  
762 morphological differences between the two cytotypes are mainly related to quantitative traits (frond width,  
763 frond area, length/width ratio, root length, aerenchyma extension, vein number) and only secondarily to  
764 qualitative ones (hyaline frond edge, aerenchyma position). Analysis of stomatal morphological  
765 parameters (size and density) highlighted the presence of significant differences in guard cell size, which  
766 are the largest in the GGM cytotype. This is likely related to its increased genome size, as already reported  
767 for *Lemnaceae* (Hoang et al., 2019). Also for the biochemical traits observed, as pigment content and  
768 RGR, hybrids have intermediate values, with triploid hybrids more closely related to *L. gibba* and diploid  
769 clones more similar to *L. minor*, suggesting that different genome contributions also affect biochemical  
770 traits and, possibly, plant physiological performance. Higher ploidy may also enable enhanced genetic  
771 capacity to respond to abiotic stress that is worth to be investigated. In conclusion, no morphological  
772 criterion is *per se* sufficient to provide unequivocal identification of *Lemna × mediterranea* clones, and  
773 the use of molecular analysis is strongly suggested.

774 As from the analysed samples, *L. × mediterranea* is distributed over a wide geographic area, centred in  
775 the Mediterranean region, and includes both reciprocal crosses of *L. minor* and *L. gibba*, as revealed by  
776 plastid marker analysis. Population structure analysis inferred from AFLP data using different  
777 bioinformatics models, subtend the occurrence of different lineages, the parental populations, converging  
778 in the formation of an interspecific hybrid population. In this respect, the limited number of private alleles  
779 detected in *L. × mediterranea* suggests a fully and bipartisan genomic contribution of both parents merged  
780 in the hybrid. Phylogenetic network reconstruction also identifies the dual contribution of the parent  
781 species, placing the hybrid group closer to *L. gibba* than to *L. minor*, and supports its separation in at least  
782 two, possibly three, diverging clusters (Fig. 4), also in agreement with the similarity tree generated from  
783 TBP profiles (Fig. S2). Greater similarity of hybrids to European clones of the parent species suggests  
784 their origin from a limited number of European ecotypes, in accordance with their lower intrataxon genetic  
785 diversity with respect to parental species. Some degree of genetic diversity among hybrid clones, although  
786 limited, favours the interpretation that each clone originated independently from different parental clones.  
787 In fact, according to NewHybrids results, all clones have high probability to represent F1 populations. No  
788 evidence for backcrossing emerged for the seven clones, despite *L. × mediterranea* may occur in

789 association with either of the parental species, as reported in Italy for *L. symmeter* (Giuga, 1973) and for  
790 clones identified as non-gibbous forms of *L. gibba* but having the plastid haplotypes of *L. minor* (Marconi  
791 et al., 2019). Such observations suggest sterility or very low fertility and self-incompatibility of hybrids.  
792 Flower induction experiments are ongoing to address these key points. However, given the low frequency  
793 of flowering of the parental species, particularly *L. minor* (Landolt, 1986), we cannot expect inbreeding  
794 or outcrossing to be frequent events in hybrids so that the possibility of producing hybrid, self-evolving  
795 lineages slowly leading to speciation, cannot be excluded. Even very low rates of sexual reproduction are  
796 in fact considered sufficient to get rid of negative mutations that accumulate in asexual populations  
797 (Hojsgaard and Hörandl, 2015). In such a framework the observed diversity can be interpreted as the result  
798 of somatic mutation accumulation in long lasting asexual lineages. Although aggregates of vegetative  
799 reproducing individuals are unlikely to establish species-like lineages (Hörandl, 2022), in the case of  
800 homoploid hybrids, speciation is now accepted even if the hybrid lineage can be established as viable  
801 progenies through vegetative (or clonal) propagation, not necessarily requiring allopolyploidisation  
802 (Comai, 2005; Sochor et al., 2015; White et al., 2018). In *Lemna*, hybrid population stability and diffusion  
803 can be clearly provided by fast clonal propagation and long-distance dispersal of these tiny plants through  
804 water flow and zoochory (Coughlan et al., 2017), promoting its establishment as a species if favoured by  
805 some competitive advantage with respect to the parental species. The success of *L. × mediterranea* is  
806 evidenced by the large geographic area and collection dates of the hybrid clones from 1954 to 2011.  
807 Recovering living populations will provide further information on hybrid distribution and origin.  
808 Another peculiarity of *L. × mediterranea* is the presence of two different but unusual cytotypes,  
809 homoploids with *L. gibba* as the pollen donor and triploids with *L. gibba* as the mother parent, while no  
810 tetraploid was found among hybrids until now. As both parental species are known to be mostly diploids  
811 (Landolt, 1986), the simplest explanation is that triploid hybrids originated from the fertilization of  
812 unreduced *L. gibba* ovules (2n) by normal haploid pollen cells (n) from *L. minor*. However, breeding  
813 between a tetraploid *L. gibba* and a diploid *L. minor* cannot be excluded. A somatic mutation leading to  
814 tetraploidy has been recently described for a *L. gibba* clone since long cultivated *in vitro* (Sarin et al.,  
815 2023). Wide variations in both genome size and chromosome number have been often reported in *Lemna*  
816 and *Wolffia*, although not all old chromosome counting data are fully reliable (Hoang et al, 2018; Hoang  
817 et al., 2022). More recent data show that triploid cytotypes are present in both *L. minor* and in the hybrid  
818 species *L. × japonica* that also includes homoploid hybrids (Ernst et al., 2023; Abramson et al., manuscript  
819 in preparation). The situation of the two intraspecific *L. minor* hybrids is in fact very similar, although *L.*  
820 *japonica*, recognized as a species in 1980 (Landolt, 1980), has a larger geographic distribution in the  
821 northern hemisphere, from Eurasia to North America, and a wider intraspecific variability (Braglia et al.,  
822 2021b) in comparison with *L. × mediterranea*. Also in that case, self-fertility and seed production has not

823 been ascertained. In both cases, the question if these large hybrid populations should be considered as true  
824 or potential species requires further investigation.

825 Hybridization is extremely common in plants and most successful hybrids are polyploid, a condition  
826 which grants full fertility eventually leading to hybrid speciation. Conversely, both homoploid and triploid  
827 hybrids are quite rare in terrestrial plants and are considered as bridges to form fully fertile, higher ploidy  
828 (tetraploid/hexaploid) species (Ramsey and Schemske 2002). In a very few cases, homoploid hybrids  
829 become stabilized over time, keeping an acceptable degree of fertility and becoming reproductively  
830 isolated from parents thanks to ecological or biological barriers (Mason and Pires, 2015) then becoming  
831 morpho-physiologically different, self-evolving species. Homoploid hybrid speciation (HHS) has been  
832 well documented in some plant species as *Helianthus* (Schwarzbach 2002), or *Senecio* (Abbott et al.,  
833 2013), but true numbers are likely underestimated (Yakimoski and Rieseberg, 2014). The number of  
834 known triploid plant species is even smaller, partially due to the triploid block effect, impairing endosperm  
835 development and inducing seed abortion (Kohler et al., 2010). In such cases, at least at early stages, clonal  
836 propagation can provide an escape route to the low degree of fertility (Vallejo-Marin and Hiscok, 2016).  
837 An interesting example of a recently generated triploid species, *Cardamine* × *insueta* Urbanska-  
838 Worytkiewicz, have been documented in the Swiss Alps (Urbanska and Landolt, 1972). The colonization  
839 of a new habitat provided almost completely reproductive isolation from the parental species while the  
840 acquisition of leaf vivipary enabled the hybrid to be a dominant species at the site despite its ploidy level  
841 (Sun et al., 2020). More detailed analysis of ecological differences between *Lemna* hybrids and parental  
842 species is also needed to understand the advantages of hybrids and the possibility of their adaptation to  
843 different ecological niches even within the same water body.

844 This study further demonstrates that interspecific hybridization can be a common mechanism to generate  
845 diversity and variation in *Lemna*, which might have played an important role in the evolution and  
846 diversification of this genus and, possibly, in other genera of duckweeds. This is in accordance with  
847 findings by Les and Philbric (1993) who, analyzing literature data for 117 genera of aquatic angiosperms,  
848 suggested that the high vagility (displacing ability) and rarity of sexual reproduction common to most of  
849 them has dramatically influenced the evolutionary consequences of two factors that have played major  
850 roles in the evolution of terrestrial angiosperms, namely hybridization and chromosome number change.

851  
852 **Author Contributions:** Conceptualization, L.M., S.C, M.A.I.; duckweed clone maintenance and  
853 investigation, M.A.I, G.F., M.F, S.C., F.M., E.P., L.B.; formal analysis, M.B., E.P., M.A.I, G.F, L.B.; data  
854 curation M.M.; writing original draft preparation, S.C, M.A.I, L.M, M.B.; writing review and editing, L.B,  
855 M.B., S.C., M.A.I.; G.F., S.G.; visualization, M.B, M.A.I, G.F.,M.F, F.G., S.C, E.P., M.M., L.B;  
856 supervision, L.M.; funding acquisition, S.C, M.A.I, L.B, L.M.

857

858 All authors have read and agreed to the published version of the manuscript.

859

860 **Funding:** This work was supported by the Grant to Department of Science, Roma Tre University by  
861 NBFC (National Biodiversity Future Center), funded by the Italian Ministry of University and Research,  
862 PNRR, Missione 4 Componente 2, “Dalla Ricerca all’Impresa”, Investimento 1.4, Project CN00000033  
863 This study was carried out within the Agritech National Research Center and received funding from the  
864 European Union Next-Generation EU (Piano Nazionale Di Ripresa e Resilienza (PNRR) – Missione 4  
865 Componente 2, Investimento 1.4 – Project CN00000022) to the National Research Council. This  
866 manuscript reflects only the authors’ views and opinions; neither the European Union nor the European  
867 Commission can be considered responsible for them.

868

869 **Data Availability Statement:** Not applicable.

870

871 **Acknowledgments:** We wish to warmly thank Diego Breviario for the fruitful TBP legacy and Walter  
872 Lammler for providing clones of the Landolt’s collection

873

874 **Conflicts of Interest:** The authors declare no conflict of interest.

875 **REFERENCES**

876

877 Abbott, R.J., Hegarty, M.J., Hiscock, S.J. & Brennan, A.C. (2010). Homoploid hybrid speciation in action.  
878 *Taxon* 59: 1375–1386.

879 Abbott, R., Albach, D., Ansell, S., Arntzen, J.W., Baird, S.J., Bierne, N., Boughman, J., Brelsfordj, A.,  
880 Buerkle, C.A., Buggs, R., Butlin, R.K., Dieckmann, U., Eroukhmanoff, F., Grill, A., Cahan, S.H.,  
881 Hermansen, J.S., Hewitt, G., Hudson, A.G., Jiggins, C., Jones, J., Keller, B., Marczewski, T., Mallet,  
882 J., Martinez-Rodriguez, P., Möst. M., Mullen, S., Nichols. R., Nolte, A.W., Parisod, C., Pfennig, K.,  
883 Rice, A.M., Ritchie, M.G., Seifert, B., Smadja, C.M., Stelkens, R., Szymura, J.M., Väinölä, R., Wolf,  
884 J.B., Zinner, D. (2013) Hybridization and speciation. *J Evol Biol.* 26: 229-46. doi: 10.1111/j.1420-  
885 9101.2012.02599. x.

886 Abramson, B.W, Hoang, P.T.N., Pasaribu, B., Ernst, E., Braglia, L., Petrus, S., Tran, T.N.B., Fuchs, J.,  
887 Schubert, V., Hartwick, N., Wang, M., Lensink, M., Colt, K., Bog, M., Sree, S., Morello, L.,  
888 Appenroth, K.J., Schubert, I., Martienssen, R.A., Lam, E., Michael, T.M. The duckweed *Lemna*  
889 minor genome spans several ploidy levels. Manuscript in preparation

890 Anderson, E.C., Thompson, E.A. (2002). A model-based method for identifying species hybrids using  
891 multilocus genetic data. *Genetics* 160: 1217–1229.

892 Bog, M., Appenroth, K.J., Sree, K.S. (2019). Duckweed (*Lemnaceae*): its molecular taxonomy. *Front.*  
893 *Sustain. Food Syst.*, 3: 117

894 Bog, M., Appenroth, K.J., Sree, K.S. (2020a). Key to the determination of taxa of *Lemnaceae*: an update.  
895 *Nord. J. Bot.*, 38 10.1111/njb.02658

896 Bog, M., Sree, K.S., Fuchs, J., Hoang, P.T., Schubert, I., Kuever, J. & Appenroth, K. J. (2020b). A  
897 taxonomic revision of *Lemna* sect. *Uninerves* (*Lemnaceae*). *Taxon*, 69: 56-66.

898 Borisjuk, N., Chu, P., Gutierrez, R., Zhang, H., Acosta, K., Friesen, N., et al. (2015). Assessment,  
899 validation and deployment strategy of a two barcode protocols for facile genotyping of duckweed  
900 species. *Plant Biol.* 17: 42–49. doi: 10.1111/plb.12229

901 Bradford, M.M. (1976). A rapid and sensitive method for the quantitation of microgram quantities of  
902 protein utilizing the principle of protein-dye binding. *Anal. Biochem.* 72: 248–254

903 Braglia, L., Lauria M., Appenroth K.J., Bog M., Breviario D., Grasso A., Gavazzi F., Morello L. (2021a).  
904 Duckweed species genotyping and interspecific hybrid discovery by tubulin-based polymorphism  
905 fingerprinting. *Front Plant Sci.* 8: 625670.

906 Braglia, L., Breviario, D., Gianì, S., Gavazzi, F., De Gregori, J., Morello, L. (2021b) New insights into  
907 interspecific hybridization in *Lemna* L. Sect. *Lemna* (*Lemnaceae* Martinov). *Plants*, 10, 2767

- 908 Braglia, L., Gavazzi, F., Gianì, S., Morello, L., Breviario, D. (2023). Tubulin-Based Polymorphism (TBP)  
909 in plant genotyping. In: Shavrukov, Y. (eds) Plant Genotyping. Methods in Molecular Biology, vol  
910 2638. Humana, New York, NY. [https://doi.org/10.1007/978-1-0716-3024-2\\_28](https://doi.org/10.1007/978-1-0716-3024-2_28)
- 911 Bretagnolle, F., Thompson, J.D. (1995) Gametes with the somatic chromosome number: mechanisms of  
912 their formation and role in the evolution of autopolyploid plants. *New Phytol* 129:1–22.  
913 doi:10.1111/j.1469-8137.1995.tb03005.x
- 914 Ceschin S., Leacche I., Pascucci S., Abati S. (2016). Morphological study of *Lemna minuta* Kunth, an  
915 alien species often mistaken for the native *L. minor* L. (Araceae). *Aquatic Botany* 131: 51–56.
- 916 Comai, L. (2005). The advantages and disadvantages of being polyploid. *Nat. Rev. Genet.* 6: 836–846
- 917 Coughlan N. E., Kelly T. C., Davenport J., Jansen M. A. K. (2017). Up, up and away: bird-mediated  
918 ectozoochorous dispersal between aquatic environments. *Freshwater Biology*, 62: 631-648
- 919 Da Silva, H.A., Scapim, C.A., Vivas, J.M.S., do Amaral Júnior, A.T., Pinto, R.J.B., Mourão, K.S.M.,  
920 Rossi, R.M., Baleroni, A.G., (2020). Effect of ploidy level on guard cell length and use of stomata to  
921 discard diploids among putative haploids in maize. *Crop Sci.* 60: 1199–1209
- 922 De Lange, L. (1981). The occurrence of mixed populations of different genotypes of the *Lemna gibba* -  
923 *Lemna minor* complex. *Acta Bot. Neerl.*, 30: 191–197.
- 924 De Lange, L., Pieterse, A. H. (1973). A comparative study of the morphology of *Lemna gibba* L. and  
925 *Lemna minor* L. *Acta Bot. Neerl.*, 22: 510-517
- 926 De Lange, E., and Westinga, E. (1979). The distinction between *Lemna gibba* L. and *Lemna minor* L. on  
927 the basis of vegetative characters. *Acta Bot. Neerl.* 28: 169–176. doi: 10.1111/j.1438-  
928 8677.1979.tb00332.x
- 929 Earl, D.A., von Holdt, B.M. (2012). Structure Harvester: a website and program for visualizing  
930 STRUCTURE output and implementing the Evanno method. *Conserv. Genet. Resour.* 4  
931 <https://doi.org/10.1007/s12686-011-9548-7>.
- 932 Ernst, E., Abramson, B., Acosta, K., Hoang, P.T.N., Mateo-Elizalde, C.; Schubert, V., Pasaribu, B.,  
933 Hartwick, N., Colt, K., Aylward, A., et al. (2023). The genomes and epigenomes of aquatic plants  
934 (Lemnaceae) promote triploid hybridization and clonal reproduction. bioRxiv preprint. doi:  
935 <https://doi.org/10.1101/2023.08.02.551673>.
- 936 Evanno, G., Regnaut, S., Goudet, J. (2005) Detecting the number of clusters of individuals using the  
937 software structure: a simulation study. *Mol Ecol* 14: 2611–2620.
- 938 Giuga, G. Vita segreta di Lemnacee. (1973) In: *Lemna Symmeter* G. Giuga-Species Nova; Blasio -  
939 Napoli, Italy, p. 19.
- 940 Giuga, G. (1950). Su una presumibile proprietà caratteristica dei numeri primi. *Ist. Lombardo Sci. Lett.*  
941 *Rend. A* 83: 511-528.

- 942 Hammer, Ø., Harper, D.A.T., & Ryan, P.D. (2001). PAST: Paleontological Statistics Software Package  
943 for Education and Data Analysis. *Palaeontologia Electronica*, 4, 9 p. [http://palaeo-  
electronica.org/2001\\_1/past/issue1\\_01.htm](http://palaeo-<br/>944 electronica.org/2001_1/past/issue1_01.htm)
- 945 Hoang, P.N.T., Michael, T.P., Gilbert, S., Chu, P., Motley, S.T., Appenroth, K.J., Schubert, I., Lam, E  
946 (2018). Generating a high-confidence reference genome map of the Greater Duckweed by integration  
947 of cytogenomic, optical mapping, and Oxford Nanopore technologies. *Plant J*, 96: 670–684
- 948 Hoang, P.T.N., Schubert, V., Meister, A., Fuchs, J., & Schubert, I. (2019). Variation in genome size, cell  
949 and nucleus volume, chromosome number and rDNA loci among duckweeds. *Scientific Reports*, 9,  
950 3234.
- 951 Hoang, P.T.N., Fuchs, J, Schubert, V, Tran, TBN, Schubert, I. (2022). Chromosome Numbers and  
952 Genome Sizes of All 36 Duckweed Species (Lemnaceae). *Plants*, 11: 2674. doi:  
953 10.3390/plants11202674.
- 954 Hojsgaard, D., Hörandl, E. (2015). A little bit of sex matters for genome evolution in asexual plants. *Front  
955 Plant Sci* 6:82. doi: 10.3389/fpls.2015.00082.
- 956 Hörandl, E. (2022). Novel Approaches for Species Concepts and Delimitation in Polyploids and Hybrids.  
957 *Plants* 11: 204. <https://doi.org/10.3390/plants11020204>
- 958 Huson, D.H., Bryant, D. (2006). Application of phylogenetic networks in evolutionary studies. *Mol Biol  
959 Evol.* Feb;23(2):254-67. doi: 10.1093/molbev/msj030. Epub 2005 Oct 12. PMID: 16221896.
- 960 Jakobsson, M., Rosenberg, N.A. (2007). CLUMPP: a cluster matching and permutation program for  
961 dealing with label switching and multimodality in analysis of population structure. *Bioinformatics*  
962 23. <https://doi.org/10.1093/bioinformatics/btm233>.
- 963 Kandeler, R. (1975) Species delimitation in the genus *Lemna*. *Aquat. Bot.*, 1: 365-376
- 964 Kassambara, A. and Mundt, F. (2020) Factoextra: extract and visualize the results of multivariate data  
965 analyses. R Package Version 1.0.7.
- 966 Köhler, C, Mittelsten Scheid O, Erilova A. (2010). The impact of the triploid block on the origin and  
967 evolution of polyploid plants. *Trends Genet.* 26: 142-148. doi: 10.1016/j.tig.2009.12.006.
- 968 Lämmler, W., Bogner, J. (2014) Elias Landolt and the duckweeds. *Aroideana* 37: 81–88.
- 969 Landolt, E. (1975) Morphological differentiation and geographical distribution of the *Lemna gibba*-  
970 *Lemna minor* group. *Aquat. Bot.*, 1: 345–363
- 971 Landolt, E. (1980). Key to the determination of taxa within the family of Lemnaceae. *Veroff. Geobot.* 70:  
972 13–21.
- 973 Landolt, E. (1986). The family of Lemnaceae: a monographic study. 2. Veröff. Geobot. Inst., ETH, Stiftung  
974 Rübél, Zurich.

- 975 Lefever, S., Rihani, A., Van der Meulen, J. et al. (2019) Cost-effective and robust genotyping using  
976 double-mismatch allele-specific quantitative PCR. *Sci Rep* 9: 2150.
- 977 Les, D.H., and Crawford, D. J. (1999). *Landoltia* (Lemnaceae) a new genus of duckweeds. *Novon*, 9: 530–  
978 533. doi: 10.2307/3392157
- 979 Les, D.H., Crawford, D. J., Landolt, E., Gabel, J. D., and Kimball, R. T. (2002). Phylogeny and  
980 systematics of Lemnaceae, the duckweed family. *Syst. Bot.*, 2: 221–240.
- 981 Les, D.H. and Philbrick, C.T. (1993) Studies of hybridization and chromosome number variation in  
982 aquatic angiosperms: evolutionary implications. *Aquatic Botany* 44:181–228.
- 983 Li, S., Li, L., Fan, W., Ma, S., Zhang, C., Kim, J.C., Wang, K., Russinova, E., Zhu, Y., Zhou, Y. (2022).  
984 LeafNet: a tool for segmenting and quantifying stomata and pavement cells, *The Plant Cell*, 34: 1171–  
985 1188
- 986 Lichtenthaler, H.K. (1987). Chlorophyll fluorescence signatures of leaves during the autumnal  
987 chlorophyll breakdown. *J. Plant Physiol.*, 131: 101-110
- 988 Marconi, G., Landucci, F., Rosellini, D., Venanzoni, R., Albertini, E. (2019). DNA barcoding as a tool  
989 for early warning and monitoring alien duckweeds (*Lemna* sp.pl.): the case of Central Italy, *Plant*  
990 *Biosystems - An International Journal Dealing with all Aspects of Plant Biology*, 153: 660-668, DOI:  
991 10.1080/11263504.2018.1536087
- 992 Mason, A.S., Pires, J.C. (2015) Unreduced gametes: meiotic mishap or evolutionary mechanism? *Trends*  
993 *Genet* 31:5–10. doi:10.1016/j.tig.2014.09.011
- 994 McGoey B.V., Chau K. and Dickinson T.A. (2014) Stomata Size in Relation to Ploidy Level in North  
995 American Hawthorns (*Crataegus*, Rosaceae) *Madroño*, 61(2):177-193. 2014. Published By:  
996 California Botanical Society DOI: <http://dx.doi.org/10.3120/0024-9637-61.2.177>
- 997 Nei, M. (1973) Analysis of Gene Diversity in Subdivided Populations *Proc. Nat. Acad. Sci. USA*, vol. 70,  
998 No. 12, Part I, 3321-3323.
- 999 Nei M, Li WH (1979) Mathematical model for studying genetic variation in terms of restriction  
1000 endonucleasis. *Proceedings of the National Academy of Sciences of the USA*, 76, 5269–5273.
- 1001 Pritchard, J.K., Stephens, M., Donnelly, P. (2000). Inference of population structure using multilocus  
1002 genotype data. *Genetics* 155: 945–959.
- 1003 R Core Team (2022). R: A language and environment for statistical computing. R Foundation for  
1004 Statistical Computing, Vienna, Austria. URL <https://www.R-project.org/>.
- 1005 Ramsey, J. & Schemske, D. W. (2002). Neopolyploidy in flowering plants. *Annu. Rev. Ecol. Syst.* 33:  
1006 589–639.



- 1007 Rieseberg, L.H., Kim, S.C., Randell, R.A., Whitney, K.D., Gross, B.L., Lexer, C., et al. (2007).  
1008 Hybridization and the colonization of novel habitats by annual sunflowers. *Genetica* 129: 149–165.  
1009 doi: 10.1007/s10709-006-9011-y
- 1010 Sarin, L.P., Sree, K.S., Bóka, K., Keresztes, Á., Fuchs, J., Tyagi, A.K., Khurana, J.P., Appenroth, K.J.  
1011 (2023). Characterisation of a spontaneous mutant of *Lemna gibba* G3 (Lemnaceae). *Plants*, 12: 2525.  
1012 <https://doi.org/10.3390/plants12132525>
- 1013 Schneider, C.A., Rasband, W.S., Eliceiri, K.W. (2012). NIH Image to ImageJ: 25 years of image analysis.  
1014 *Nature Methods* 9, 671-675.
- 1015 Schwarzbach, A.E., Rieseberg, L.H. (2002) Likely multiple origins of a diploid hybrid sunflower species.  
1016 *Mol. Ecol.* 11: 1703–1715. doi:10.1046/j.1365-294X.2002.01557.x
- 1017 Sochor, M., Vašut, R.J., Sharbel, T.F., Trávníček, B. (2015). How just a few makes a lot: Speciation via  
1018 reticulation and apomixis on example of European brambles (*Rubus* subgen. *Rubus*, Rosaceae). *Mol.*  
1019 *Phylogenet. Evol.* 89:13–27.
- 1020 Schlüter, P.M. and Harris, S.A. (2006) Analysis of Multilocus Fingerprinting Data Sets Containing  
1021 Missing Data. *Molecular Ecology Notes*, 6: 569-572. [http://dx.doi.org/10.1111/j.1471-](http://dx.doi.org/10.1111/j.1471-8286.2006.01225.x)  
1022 [8286.2006.01225.x](http://dx.doi.org/10.1111/j.1471-8286.2006.01225.x)
- 1023 Sree, K. S., Bog, M., and Appenroth, K. J. (2016). Taxonomy of duckweeds (Lemnaceae), potential new  
1024 crop plants. *Emirate J. Food Agricult.* 28: 291–302. doi: 10.9755/ejfa.2016-01-038
- 1025 Sun, J., Shimizu-Inatsugi, R., Hofhuis, H., Shimizu, K., Hay, A., Shimizu, K.K., Sese, J. (2020). A  
1026 Recently Formed Triploid *Cardamine insueta* Inherits Leaf Vivipary and Submergence Tolerance  
1027 Traits of Parents. *Front Genet.* 11:567262. doi: 10.3389/fgene.2020.567262.
- 1028 Tang, Y., Horikoshi, M., and Li, W. (2016). ggfortify: Unified interface to visualize statistical result of  
1029 popular R packages. *The R Journal*, 8.2, 478-489
- 1030 Tayale, A., Parisod, C. (2013) Natural pathways to polyploidy in plants and consequences for genome  
1031 reorganization. *Cytogenet Genome Res* 140:79–96. doi:10.1159/000351318
- 1032 Tippery, N.P., Les, D. H., and Crawford, D.J. (2015). Evaluation of phylogenetic relationships in  
1033 Lemnaceae using nuclear ribosomal data. *Plant Biol.* 17: 50–58. doi: 10.1111/plb.12203
- 1034 Ulrich, I., Ulrich, W. (1991). High-resolution flow cytometry of nuclear DNA in higher plants.  
1035 *Protoplasma* 165: 212-215. <https://doi.org/10.1007/BF01322292>.
- 1036 Urbanska-Worytkiewicz, K., Landolt, E., Natürliche Bastarde zwischen *Cardamine amara* L. und *C.*  
1037 *rivularis* Schur aus den Schweizer Alpen. (1972) *Berichte des Geobotanischen Institutes der ETH,*  
1038 *Stiftung Rübel.* 41:88–100.
- 1039 Vallejo-Marín, M. and Hiscock, S.J. (2016), Hybridization and hybrid speciation under global change.  
1040 *New Phytol*, 211: 1170–1187. doi:10.1111/nph.14004

- 1041 Van Echelpoel W, Boets P, Goethals P.L. (2016) Functional Response (FR) and Relative Growth Rate  
1042 (RGR) Do Not Show the Known Invasiveness of *Lemna minuta* (Kunth). PLoS One.  
1043 11(11):e0166132. doi: 10.1371/journal.pone.0166132.
- 1044 Vos, P., Hogers, R., Bleeker, M., Reijans, M., van de Lee, T., Hornes, M., Frijters, A., Pot, J., Peleman,  
1045 J., Kuiper, M., et al. (1995). AFLP: a new technique for DNA fingerprinting. Nucleic Acids Res. Nov  
1046 11;23(21):4407-14. doi: 10.1093/nar/23.21.4407.
- 1047 Wang, W., Wu, Y., Yan, Y., Ermakova, M., Kerstetter, R., and Messing, J. (2010). DNA barcoding of the  
1048 Lemnaceae, a family of aquatic monocots. BMC Plant Biol. 10:205. doi: 10.1186/1471-2229-10-205
- 1049 White, O.W, Reyes-Betancort, A., Chapman, M.A., Carine, M.A. (2018). Independent homoploid hybrid  
1050 speciation events in the Macaronesian endemic genus *Argyranthemum*. Mol Ecol. 23:4856-4874. doi:  
1051 10.1111/mec.14889.
- 1052 Yakimowski, S.B., Rieseberg, L.H. (2014) The role of homoploid hybridization in evolution: a century of  
1053 studies synthesizing genetics and ecology. Am J Bot. Aug;101(8):1247-58. doi:  
1054 10.3732/ajb.1400201.
- 1055 Zhang, K., Chen, Y.P., Zhang, T.T., Zhao, Y., Shen, Y., Huang, L., Gao, X., Guo, J.S. (2014). The logistic  
1056 growth of duckweed (*Lemna minor*) and kinetics of ammonium uptake. Environ Technol. Mar-  
1057 Apr;35(5-8):562-7. doi: 10.1080/09593330.2013.837937.
